## **A Calcium/Palmitoylation Switch Interfaces the Signaling Networks of Stress Response and Transition to Flowering**

Hee Jin Park<sup>\*1</sup>, Francisco Gamez-Arjona<sup>2,3\*</sup>, Marika Lindahl<sup>2</sup>, Rashid Aman<sup>4</sup>, Irene Villalta<sup>5</sup>, Raul Carranco<sup>2</sup>, Chae Jin Lim<sup>1</sup>, Elena García<sup>2</sup>, Ray A. Bressan<sup>6</sup>, Sang Yeol Lee<sup>4</sup>, Clara Sánchez-Rodríguez<sup>3</sup>, Jose M Pardo<sup>2</sup>, Woe-Yeon Kim<sup>4,7+</sup>, Francisco J. Quintero<sup>2+</sup>, and Dae-Jin Yun<sup>1,8+</sup>

<sup>1</sup> Department of Biomedical Science and Engineering, Konkuk University, Seoul 05029, South Korea

<sup>2</sup> Institute of Plant Biochemistry and Photosynthesis, Consejo Superior de Investigaciones Científicas and Universidad de Sevilla, Seville 41092, Spain

<sup>3</sup> Swiss Federal Institute of Technology in Zurich, Zurich CH-8092, Switzerland

<sup>4</sup> Division of Applied Life Science (BK21plus Program), Plant Molecular Biology and Biotechnology Research Center, Graduate School of Gyeongsang National University, Jinju 52828, South Korea

<sup>5</sup> Institut de Recherche sur la Biologie de l'Insecte, Université de Tours, 37200 Tours, France

<sup>6</sup> Department of Horticulture and Landscape Architecture, Purdue University, West Lafayette, Indiana 47907

<sup>7</sup> Institute of Agriculture & Life Sciences, Graduate School of Gyeongsang National University, Jinju 52828, South Korea

<sup>8</sup> Key Laboratory of Molecular Epigenetics of the Ministry of Education (MOE), Northeast Normal University, Changchun 130024, China

<sup>+</sup>Correspondence: [djyun@konkuk.ac.kr](mailto:djyun@konkuk.ac.kr); [kim1312@gnu.ac.kr](mailto:kim1312@gnu.ac.kr); [fjquintero@ibvf.csic.es](mailto:fjquintero@ibvf.csic.es)

<sup>\*</sup> H. J. Park and F. Gamez-Arjona contributed equally to this work.

**Running title:** S-acylation of SOS3/CBL4 regulates flowering.

**Short summary:** S-acylation promoted the nuclear import of SOS3/CBL4 for the selective stabilization of the photoperiodic floral regulator GIGANTEA to fine-tune flowering time in a saline environment. Spatial separation of SOS3 acts as a molecular switch co-regulating stress adaptation and time of flowering.

## ABSTRACT

The precise timing of flowering in adverse environments is critical for plants to secure reproductive success. We report a novel mechanism controlling the time of flowering by which the palmitoylation-dependent nuclear import of protein SOS3/CBL4, a Ca<sup>2+</sup>-signaling intermediary in the plant response to salinity, results in the selective stabilization of the flowering time regulator GIGANTEA inside the nucleus under salt stress, while degradation of GIGANTEA in the cytosol releases the protein kinase SOS2 to achieve salt tolerance. S-acylation of SOS3 was critical for its nuclear localization and the promotion of flowering, but dispensable for salt tolerance. SOS3 interacted with the photoperiodic flowering components GIGANTEA and FKF1 on the *CONSTANS* gene promoter to sustain the transcription of *CO* and *FT* under salinity. Thus, SOS3 acts as a Ca<sup>2+</sup>- and palmitoylation-dependent molecular switch that fine-tunes flowering in a saline environment through the shared spatial separation and selective stabilization of GIGANTEA. The SOS3 protein connects two signaling networks to co-regulate stress adaptation and time of flowering.

## KEYWORDS

Flowering time, stress adaptation, nucleocytoplasmic partitioning, palmitoylation, S-acylation.

## 1 INTRODUCTION

2 Natural selection of different biological forms and functions occurs in the variable physical  
3 environments. Depending on the specific environment, different traits are favored for  
4 reproduction and perpetual survival of the species. For plants, extremes in the cardinal  
5 conditions such as light, temperature and most importantly, the quantity and quality of  
6 available water and nutrients are among the major drivers of natural selection (Maggio et al.,  
7 2018). Adaptive responses must be coupled to adjustments in the reproductive strategy to  
8 be favored by selection. Seasonal changes, especially in temperature and day length,  
9 provide key signals setting the time of flowering. However, depending on the dynamics of  
10 environmental stressors, transition to flowering is adjusted earlier or later to maximize the  
11 production of dormant structures (seeds) that can survive prolonged adverse episodes and  
12 eventually re-initiate a life cycle (Kazan and Lyons, 2016). Environmental stressors such as  
13 water and nutrient deprivation generally induce earlier flowering (Kazan and Lyons, 2016;  
14 Takeno, 2016), whereas salinity has been reported to delay flowering (Kim et al., 2007; Kim  
15 et al., 2013a; Li et al., 2007; Ryu et al., 2014).

16 In the model plant *Arabidopsis thaliana*, the major signaling systems that perceive  
17 environmental cues and initiate flowering converge on a few key integrators. *CONSTANS*  
18 (*CO*) is a central promoter of the photoperiodic flowering pathway through its enhancement  
19 of the expression of the floral-inductive *FLOWERING LOCUS T (FT)* in long-day conditions  
20 (Corbesier and Coupland, 2006; Turck et al., 2008). *CO* is transcriptionally regulated by the  
21 opposing action of activators and repressors controlled by the circadian clock, including  
22 *GIGANTEA (GI)* and *CYCLING DOF FACTORS (CDF1, 2, 3 and 5)*, and post-  
23 transcriptionally by photoreceptors that affect *CO* protein stability (Fornara et al., 2009;  
24 Imaizumi et al., 2005; Sawa et al., 2007; Suarez-Lopez et al., 2001; Valverde et al., 2004).  
25 The abundance of *CDF* proteins is in turn depressed by the blue light receptor F-box E3  
26 ubiquitin ligase *FKF1 (FLAVIN-BINDING, KELCH REPEAT, F-BOX 1)* (Fornara et al., 2009;  
27 Imaizumi et al., 2005; Suarez-Lopez et al., 2001). The clock protein *GI* interacts with and

28 stabilizes FKF1 in a blue light-dependent manner, thus promoting the degradation of CDF  
29 proteins and *CO* expression in long days (Sawa et al., 2007). GI also forms a complex with  
30 and neutralizes *FT* repressors (Sawa and Kay, 2011) to enable *FT* transcription and promote  
31 transition to flowering (Mathieu et al., 2009).

32 Salt stress delays flowering time in *Arabidopsis* by repressing expression of *CO* and  
33 *FT* (Kim et al., 2007; Li et al., 2007). Moreover, the salt-induced BROTHER OF FT AND  
34 TBL1 (BFT) competes with *FT* for binding to FLOWERING LOCUS D (*FD*), a co-  
35 transcription factor of *FT* in flowering initiation, and contributes to late flowering (Ryu et al.,  
36 2014). In parallel, salinity promotes extension of vegetative growth by stabilizing *DELLA*  
37 proteins that act as repressors of cell proliferation and expansion, and of flowering (Achard  
38 et al., 2006). Other regulators mediating abiotic stress responses are also known to  
39 modulate flowering time and *vice versa*, but mechanistic insights are still largely missing  
40 (Park et al., 2016). Among these dual effectors is GI, that has emerged as a central hub  
41 coordinating the photoperiodic flowering pathway and stress responses against drought  
42 (Han et al., 2013; Riboni et al., 2013), cold (Cao et al., 2005; Fornara et al., 2015), salt (Kim  
43 et al., 2013a), light (Oliverio et al., 2007), and carbohydrate metabolism (Dalchau et al.,  
44 2011). The involvement of GI in stress responses includes transcriptional regulation of  
45 downstream genes (Fornara et al., 2015) and the interaction with circadian and other  
46 signaling components that in turn affect various physiological adaptations (Greenham and  
47 McClung, 2015; Park et al., 2016; Seo and Mas, 2015).

48 We have shown that GI controls salt tolerance through the direct association with key  
49 signaling components of the salinity stress response (Kim et al., 2013a; Park et al., 2016). In  
50 response to high salinity, plants utilize the SOS (Salt Overly Sensitive) pathway to maintain  
51 ion homeostasis. The core components of the SOS pathway comprise the  $\text{Na}^+/\text{H}^+$  antiporter  
52 *SOS1*, the Ser/Thr protein kinase *SOS2/CIPK24*, and two alternative calcium binding  
53 proteins, *SOS3/CBL4* and *SCaBP8/CBL10*, that activate and recruit *SOS2* to cellular  
54 membranes (Qiu et al., 2002; Quintero et al., 2002; Quan et al., 2007; Quintero et al., 2011).

55 SOS2 activates Na<sup>+</sup> efflux by phosphorylating SOS1 at its C-terminal autoinhibitory domain  
56 (Quintero et al., 2002; Quintero et al., 2011). In regular growth conditions, GI makes a  
57 complex with and inhibits SOS2 (Kim et al., 2013a). Salt stress causes the degradation of GI  
58 protein by the 26S proteasome and the release of SOS2, which is then free to interact with  
59 SOS3, activate SOS1 and mount a successful adaptation to the saline environment. The  
60 removal of GI leads to exceptional salt tolerance at least in part by mimicking Na<sup>+</sup>-induced  
61 GI degradation, whereas plants overexpressing *GI* exhibit a salt-sensitive phenotype by  
62 sequestering SOS2. The precise mechanism triggering the dissociation of the GI-SOS2  
63 complex and GI degradation under salt stress has not been resolved, although indirect  
64 evidence suggested that the Ca<sup>2+</sup>-sensor protein SOS3 played a role since excess SOS3  
65 interfered with GI-SOS2 complex formation (Kim et al., 2013a). Moreover, SOS3 has been  
66 reported to have an indeterminate role in influencing flowering time as the *sos3-1* mutant,  
67 which has impaired calcium binding, showed late flowering under salt stress (Ishitani et al.,  
68 2000; Li et al., 2007). The molecular basis of this phenotype has remained unexplained.

69 We have addressed the molecular mechanism by which SOS3 helps resetting the  
70 flowering time under salt stress. We show here that SOS3 acts as a crucial regulator of  
71 flowering under saline stress through a mechanism that involves the stabilization of GI  
72 specifically inside the nucleus. Under normal growth conditions, GI partitions between the  
73 nucleoplasm and cytoplasm. Upon salinity stress, only cytoplasmic GI is degraded, thereby  
74 releasing SOS2 to mount the salt stress response, whereas nuclear GI remains stable in  
75 physical association with SOS3, eventually leading to flowering. Notably, S-acylation with  
76 fatty acids, commonly known as protein palmitoylation (Hemsley, 2020), of SOS3 is required  
77 for the nuclear import of SOS3 but dispensable for the interaction with GI. We also  
78 demonstrate the participation of SOS3 in the GI-FKF1 transcriptional complex that promotes  
79 transcription of *CO*, a crucial floral activator. These results reveal the molecular linkages of  
80 networks controlling salinity stress responses and the adaptive initiation of flowering under  
81 adverse environments. They also reveal a novel mechanism for transcriptional regulation of

82 flowering determinants by a Ca<sup>2+</sup>-activated protein whose nuclear import is controlled by S-  
83 acylation.

84

## 85 **RESULTS**

86

### 87 **SOS3 controls flowering under saline stress through the CO/FT pathway**

88 Previously we have shown that GI, which promotes photoperiodic-dependent flowering in  
89 long days (LDs), also functions to restrain the activity of the SOS pathway by sequestering  
90 SOS2 (Kim et al., 2013a). Upon salt stress, the GI-SOS2 complex dissociates and free GI  
91 degrades to delay flowering. This creates a reciprocating on/off mechanism coordinating  
92 signal networks of stress response and time of flowering. Under regular growth conditions,  
93 *sos1-1*, *sos2-2* and *sos3-1* mutants flowered as the wild-type (Kim et al., 2013a; Li et al.,  
94 2007). However, the flowering of the *sos3-1* mutant was delayed under salt stress compared  
95 to wild-type, *sos1-1* and *sos2-2* (Figure 1). The *sos1-1* mutant exhibited maximal sensitivity  
96 to 30 mM NaCl among all genotypes tested but still flowered normally, indicating that  
97 delayed flowering in *sos3-1* plants was not a consequence of Na<sup>+</sup> toxicity.

98       Ultimately, salt stress delays flowering because of reduced transcript levels of the GI-  
99 regulated floral activator *FT* (Li et al., 2007; Kim et al., 2013a; Sawa et al., 2007; Sawa and  
100 Kay, 2011). In the wild-type, salt stress altered the photoperiodic oscillation of *CO* transcripts  
101 and instead promoted the increase of *CO* throughout dusk and night (Figure 1C). *FT* levels  
102 followed the opposite trend, with a marked decline after midday (ZT8) and losing the maxima  
103 at dusk (ZT16) typical of untreated controls (Cerdan and Chory, 2003; Suarez-Lopez et al.,  
104 2001). *CO* and *FT* transcripts in the *sos3-1* mutant followed wild-type dynamics under  
105 control conditions, but salt treatment reduced *CO* at night, thus departing from the wild-type  
106 behavior, and abated further the *FT* transcript levels compared to the wild-type (Figure 1C).  
107 The diurnal dynamics of the *GI* transcript was not affected by salt or the *sos3-1* mutation  
108 (Figure 1C). Salinity did not alter the transcript levels of other flowering genes such as *FKF1*,

109 *SOC1*, *FLD* (*FLOWERING LOCUS D*), *FLC*, and *FCA* (*FLOWERING TIME CONTROL*  
110 *PROTEIN FCA*) (Supplemental Figure S1) (Li et al., 2007). These results indicate that *SOS3*  
111 not only mediates adaption to salinity through the SOS pathway but also participates in  
112 resetting flowering time through the CO-FT module under salt stress.

113

#### 114 ***SOS3* stabilizes GI in the nucleus under salt stress**

115 Accumulation of the GI protein in late afternoon of LDs promotes the transcription of floral  
116 activators *CO* and *FT* (Sawa et al., 2007; Sawa and Kay, 2011), and *GI* overexpression  
117 leads to early flowering (David et al., 2006). Overexpression of *GI* in *sos1-1* and *sos2-2*  
118 mutant backgrounds promoted unconditional early flowering but failed to suppress the  
119 delayed flowering of the *sos3-1* mutant under salt stress (Figure 1A and 1B). This suggests  
120 that promotion of flowering during salt stress by GI strictly requires a functional *SOS3*.

121 GI is a nucleo-cytoplasmic protein, and forced spatial segregation of GI into nuclear or  
122 cytosolic compartments results in different outputs of GI function (Kim et al., 2013b).  
123 Transgenic plants exclusively expressing a recombinant GI protein fused to a nuclear  
124 localization signal (*GIpro:GI-GFP-NLS* in *gi-2* mutant, henceforth *GI-NLS*) resulted in  
125 unconditional early flowering compared to wild-type or control transgenic plants expressing  
126 nucleo-cytoplasmic *GIpro:GI-GFP* (Kim et al., 2013b). Conversely, transgenic plants  
127 expressing a preferentially cytoplasmic GI protein fused to a nuclear export signal (*GIpro:GI-*  
128 *GFP-NES* in *gi-2*, henceforth *GI-NES*) exhibited late flowering due to nuclear exclusion of  
129 GI. This late flowering of *GI-NES* plants was exacerbated under salt stress and resembled  
130 that of the untransformed *GI*-deficient mutant *gi-2* (Figure 2A and 2B). These results indicate  
131 that only the nuclear GI pool appears to be in control of promoting the photoperiodic  
132 flowering pathway, and that the salt-induced delay in flowering known to result from a  
133 decrease in the steady-state levels of GI protein (Kim et al., 2013a) affects primarily the  
134 cytosolic GI pool. Accordingly, we found that salt-induced degradation of a tagged *GI-HA*  
135 protein occurred only in the cytosol and not in the nucleus (Figure 2C and Supplemental



136 Figure S2A). This observation was confirmed with salt-treated tobacco leaves that  
137 transiently expressed *GI-GFP* (Supplemental Figure S2B). Collectively, these results  
138 indicate that import to and preservation of GI stability inside the nucleus is critical to ensure  
139 flowering under salinity stress.

140 To examine whether SOS3 is involved in the salt-regulated GI stability, *GI-OX*, *sos2-2*  
141 *GI-OX* and *sos3-1 GI-OX* transgenic plants were treated with 100 mM NaCl for 12 h starting  
142 at ZT2, and cytosolic and nuclear proteins were extracted. Salt-induced degradation of  
143 cytosolic GI was found in all plant lines (Figure 2C). By contrast, reduction of the nuclear GI  
144 pool was found only in *sos3-1 GI-OX* transgenic plants. This result suggests that SOS3 is  
145 needed for the stabilization of the GI protein within the nucleus under salt stress. We also  
146 tested whether CBL10/SCaBP8 (CALCINEURIN B-LIKE10/SOS3-LIKE CALCIUM BINDING  
147 PROTEIN8), a homolog of SOS3/CBL4 that interacts with SOS2 to impart salt tolerance  
148 (Quan et al., 2007) is involved in salinity-delayed flowering. Unlike *sos3-1*, the salt-induced  
149 delay in flowering was not observed in the *cb110* mutant (Supplemental Figure S3).

150

### 151 **SOS3 interacts with GI in a calcium-dependent manner**

152 Next, we tested whether salinity influenced the interaction of SOS3 with GI. Co-  
153 immunoprecipitation (co-IP) from tobacco leaves showed that GI-HA interacted with SOS3-  
154 MYC. The interaction was enhanced by 100 mM NaCl or 3 mM Ca<sup>2+</sup> treatments, whereas  
155 EGTA suppressed the interaction (Figure 3A and 3B). Moreover, the mutant protein SOS3-1  
156 bearing a three-amino acid deletion in the third EF-hand motif that abrogates interaction with  
157 SOS2 (Guo et al., 2004), also failed to interact with GI (Figure 3C). This suggests that Ca<sup>2+</sup>  
158 promotes the interaction of SOS3 and GI. The Ca<sup>2+</sup>-dependent interaction of SOS3 with GI  
159 was confirmed by BiFC in tobacco (Figure 3D). The number of fluorescent nuclei and total  
160 fluorescence per area unit were counted as indicators of interaction strength (Figure 3E and  
161 Supplemental Figure S4A). Both NaCl and Ca<sup>2+</sup> enhanced the interaction of GI and SOS3,  
162 whereas EGTA repressed the interaction. Again, GI did not interact with the mutant protein

163 SOS3-1 (Figure 3D and 3E; control of protein expression in Supplemental Figure S4B),  
164 indicating that Ca<sup>2+</sup> binding of SOS3 is important for interaction with GI.

165

### 166 **S-acylation of SOS3 is crucial for nuclear import to ensure flowering under salt stress**

167 Like GI, SOS3 is a nucleo-cytoplasmic protein (Batistič et al., 2010). N-myristoylation of  
168 SOS3 at Gly-2 is essential for the function of SOS3 in salt tolerance (Ishitani et al., 2000;  
169 Quintero et al., 2002). In addition, SOS3 has been suggested to undergo S-acylation at  
170 residue Cys-3 (Held et al., 2011). Therefore, we first confirmed that SOS3 is S-acylated *in*  
171 *vivo* and then tested whether N-myristoylation and S-acylation of SOS3 influenced protein  
172 localization and salt-induced delay of flowering. S-acylation at Cys-3 of wild-type SOS3 and  
173 mutant proteins G2A, C3A and G2A/C3A expressed in tobacco was tested by the acyl resin-  
174 assisted capture (acyl-RAC) method (Chai et al., 2019). Free cysteines in proteins were  
175 blocked with N-ethylmaleimide (NEM) prior to treatment or not with hydroxylamine (HyA),  
176 which breaks cysteine thioester bonds with fatty acids, and then proteins were attached  
177 covalently to the resin matrix through the newly formed cysteine thiols. Proteins were  
178 considered to be S-acylated if retention was observed only upon HyA treatment. Results  
179 demonstrated that SOS3 was S-acylated at Cys-3 and that this modification took place  
180 independently of myristoylation of Gly-2 (Figure 4A). The lower recovery of SOS3-G2A  
181 compared to SOS3 might due to decreased accessibility of the non-myristoylated proteins to  
182 PATs, which are integral membrane proteins (Rana et al., 2018). Since protein S-acylation is  
183 highly conserved in eukaryotes, SOS3 proteins (WT, G2A, C3A and G2A/C3A) were also  
184 recovered from yeast cells and the presence of S-linked fatty acids were analyzed by  
185 blocking thiol groups in SOS3 proteins with NEM, then treating with HyA, and finally cross-  
186 linking methyl-(PEG)<sub>24</sub>-maleimide to re-exposed cysteine thiols. A band shift was observed  
187 only in SOS3 and SOS3-G2A proteins, but not in proteins bearing the C3A mutation (Figure  
188 4B). This result recapitulated the S-acylation pattern at Cys-3 of SOS3 proteins found in  
189 plants (Figure 4A).

190 We next generated transgenic plants expressing 35S:SOS3 (SOS3-OX), 35S:SOS3-  
191 G2A (SOS3-G2A, no myristoylation), and 35S:SOS3-C3A (SOS3-C3A, no S-acylation) in  
192 the *sos3-1* mutant, and tested their flowering time. All plants flowered at similar time in  
193 control conditions. Upon salt treatment, plants with constructs SOS3-OX and SOS3-G2A  
194 complemented the salt-induced flowering delay specific of *sos3-1* and had a flowering time  
195 similar to wild-type (Figure 5A and 5B), but expression of SOS3-C3A could not suppress this  
196 trait. Hence, we checked whether myristoylation and S-acylation of SOS3 were important for  
197 the interaction with GI. Total proteins extracted from tobacco leaves transiently expressing  
198 SOS3-GFP, SOS3-G2A-GFP or SOS3-C3A-GFP together with GI-HA were used for co-IP.  
199 Both SOS3-G2A-GFP and SOS3-C3A-GFP were able to interact with GI protein similarly to  
200 SOS3-GFP (Figure 5C). Notably, when expressed in *N. benthamiana* leaves, SOS3 and  
201 SOS3-G2A displayed a nucleo-cytoplasmic distribution but the nuclear import of SOS3-C3A  
202 mutant was suppressed (Figure 6A-B). The nuclear interaction of GI with SOS3-C3A was  
203 also severely reduced, although S-acylation of SOS3 was not strictly required for SOS3-GI  
204 interaction in co-IP and BiFC assays (Figure 5C-D, and Supplemental Figure S5). The GI  
205 complex with SOS3-C3A localized in a perinuclear rim suggesting aborted nuclear import  
206 and retention of the complex in the perinuclear ER. Together, these results evidence that S-  
207 acylation of SOS3 directs nuclear import of the SOS3-GI complex, which is required for  
208 ensuring flowering under salt stress conditions.

209 To further confirm the S-acylation-dependent nuclear import of SOS3 in Arabidopsis,  
210 the *sos3-1* mutant was transformed with the construct *proSOS3:SOS3-GFP*, comprising a  
211 genomic copy of the *SOS3* gene to which GFP was added in frame, and designed to mimic  
212 the native *SOS3* gene expression. Treatment of these transgenics with the potent palmitoyl-  
213 transferase inhibitor 2-bromo-palmitate (2-BrP) resulted in the complete exclusion of SOS3  
214 from the nucleus (Figure 6C-D). The nuclear integrity was not noticeably affected by 2-BrP,  
215 as revealed by DAPI staining. Counter-staining with DAPI to visualize the nucleus under  
216 regular confocal microscopy required the co-treatment with Triton-X100 to permeate the dye,

217 but the detergent removed the SOS3-GFP signal at the plasma membrane. Therefore, we  
218 used spinning-disc confocal laser microscopy (SDCLM) to measure the relative amounts of  
219 SOS3-GFP at the plasma membrane, cytoplasm (comprising cytosol and endosomes) and  
220 nuclei (Figure 6E-F). In SDCLM, multiplex laser excitation allows detection of the emission  
221 light at multiple points simultaneously for high-speed image acquisition and enhanced  
222 sensitivity towards low-abundance fluorescent proteins. Treatment with 2-BrP produced a  
223 statistically significant reduction in the nuclear pool of SOS3. Salinity (100 mM NaCl, 1 d)  
224 increased the abundance of SOS3 in all compartments, but proportionally more in nuclei  
225 (Figure 6E-F). The inhibitory effect of 2-BrP on the nuclear localization of SOS3 dominated  
226 over the stimulation by the saline treatment. Last, the nucleo-cytoplasmic partition of SOS3  
227 was inspected in *sos3-1* plants transformed to express the SOS3 protein with and without  
228 mutations G2A and C3A. Western blots with SOS3 antibodies of fractionated nuclear and  
229 cytoplasmic protein extracts demonstrated that protein SOS3-C3A was excluded from  
230 nucleus whereas the non-myristoylated SOS3-G2A mutant protein (which was still S-  
231 acylated; see Figure 4) was imported into the nucleus (Figure 6G). Together, these data are  
232 evidence of the salinity-induced and S-acylation-dependent nuclear import of SOS3.

233 Next, we tested whether the S-acylation and nuclear import of SOS3 also had a  
234 function in salt tolerance. Contrary to the wild-type SOS3, the SOS3-G2A mutant failed to  
235 suppress the salt sensitivity of *sos3-1* plants (Supplemental Figure S6), confirming that  
236 myristoylation is essential for SOS3 function in salinity tolerance (Ishitani et al., 2000;  
237 Quintero et al., 2002). Notably, SOS3-C3A largely rescued the hypersensitivity of *sos3-1*,  
238 implying that S-acylation of SOS3 is not required for salt tolerance and is only critical for  
239 flowering under salt stress.

240

#### 241 **SOS3 interacts with GI and FKF1 to regulate CO expression under salt stress**

242 FKF1, ZTL/LKP1 and LKP2 are blue-light photoreceptors that mediate light-dependent  
243 protein degradation of floral regulators by the E3 ubiquitin ligase complex (Zoltowski and

244 Imaizumi, 2014). FKF1 associates with GI to degrade CDF1, a CO transcriptional repressor  
245 that acts in late afternoon in LDs (Imaizumi et al., 2005; Sawa et al., 2007; Suarez-Lopez et  
246 al., 2001). Salt induced degradation affected GI but not FKF1 since the abundance of neither  
247 the *FKF1* transcript nor the FKF1 protein changed significantly under salt treatment  
248 (Supplemental Figures S1 and S7). To test whether nuclear-imported SOS3 associates with  
249 the GI-FKF1 complex, tagged proteins GI-HA, FKF1-MYC and SOS3-FLAG were co-  
250 expressed in tobacco leaves and submitted to co-IP with anti-FLAG antibodies. SOS3 pulled  
251 down both GI and FKF1 under regular and saline conditions (Figure 7A), suggesting that  
252 SOS3 does interact with the GI-FKF1 complex. Salt did not affect the interaction of GI and  
253 FKF1 (Figure 7A).

254 ZTL/LKP1 and LKP2 appear to have functions different to FKF1 in photoperiodic  
255 flowering. Similar to *gi* mutants, the *fkf1* mutant flowers late (Nelson et al., 2000), whereas  
256 *ztl* and *lkp2* mutants show a wild-type flowering pattern (Imaizumi et al., 2005; Somers et al.,  
257 2004). However, plants that overexpress *ZTL* and *LKP2* exhibit late flowering under LDs due  
258 to the low expression of *CO* and *FT* (Kiyosue and Wada, 2000; Somers et al., 2004).  
259 Whereas salt-induced flowering delay was suppressed in *fkf1*, which had unconditional late  
260 flowering, mutants *lkp2* and *ztl103* flowered at a similar time than wild-type plants under both  
261 normal and salt stress conditions (Supplemental Figure S8). Further, the phenotype of the  
262 double mutants *fkf1 ztl103* and *ztl103 lkp2*, and the triple mutant *fkf1 lkp2 ztl103* indicated  
263 that only FKF1 among the blue-light receptors regulates the salt-induced delay in flowering.  
264 Last, when wild-type, *gi-2*, *fkf1*, *lkp2*, and *ztl103* plants were treated with salt, only mutations  
265 of *gi-2* and *fkf1* conferred salt tolerance (Supplemental Figure S9). Together these data  
266 indicate that FKF1, specifically among other E3 ligase photoreceptors, acts at the interface  
267 between salt stress response and time of flowering signaling.

268 The FKF1-GI complex associates with the *CO* promoter to induce flowering (Sawa et  
269 al., 2007), and our evidence that SOS3 co-IPed with these proteins suggested that SOS3  
270 could be present at the transcriptional complex regulating *CO* transcription. A chromatin-

271 immunoprecipitation (ChIP) analysis of *sos3-1* transgenic plants expressing *SOS3-GFP*  
272 showed the enrichment of SOS3-GFP in amplicons A and B where GI and FKF1 associate  
273 most with the *CO* promoter (Figure 7B and Supplemental Figure S10) (Sawa et al., 2007).  
274 Fragment C of the *CO* promoter not binding GI (Sawa et al., 2007) and the *UBQ10* promoter  
275 were used as negative controls (Figure 7B-C and Supplemental Figure S10). SOS3-GFP  
276 association with the *CO* promoter increased 4 to 5-fold upon NaCl treatment (Figure 7C and  
277 Supplemental Figure S10). By contrast, the saline treatment reduced GI abundance in the  
278 *CO* promoter, reflecting the instability of GI under these stress conditions (Figure 7C).  
279 Together, these results indicate that S-acylation enables nuclear translocation of SOS3 to  
280 associate with the GI-FKF complex to enhance *CO* expression and promote flowering upon  
281 salt stress.

282

## 283 **DISCUSSION**

284

### 285 **Salt stress and flowering time**

286 Plants adjust their transition from vegetative growth to reproduction by constantly monitoring  
287 and integrating environmental cues. Water or nutrient deprivation often leads to earlier  
288 flowering presumably because the lack of essential resources inevitably halts growth,  
289 whereas a transitory or mild stress is likely to postpone flowering so that reproduction can  
290 resume at a later time (Kazan and Lyons, 2016; Maggio et al., 2018). Stress-induced early  
291 flowering is an emergency response to proceed to the next generation when vegetative  
292 plants cannot cope with adverse environmental conditions (Takeno, 2016). For instance, the  
293 drought-escape response entails adaptive shortening of the vegetative growth phase and  
294 anticipated seed production before severe dehydration becomes lethal (Riboni et al., 2013).  
295 By contrast, salinity delays flowering in several species, including *Arabidopsis* (Kim et al.,  
296 2007; Kim et al., 2013a; Li et al., 2007; Ryu et al., 2014). Plausibly, this reproductive  
297 strategy reflects that non-lethal saline levels reduce but do not impede vegetative growth,

298 since plants have developed adaptive strategies to overcome both the osmotic and ionic  
299 stresses imposed by salinity (Munns and Tester, 2008). In this regard, the ubiquitous SOS  
300 pathway enables plants to deal with excess  $\text{Na}^+$  through the coordination of ion fluxes back  
301 to the soil solution and into the xylem to protect roots from damage (Ji et al., 2013; El Mahi  
302 et al., 2019). We suggest that the ecophysiological meaning of salt-induced flowering delay  
303 is to allow plants to adapt by simultaneously reducing growth rate and altering the  
304 developmental program to extend the vegetative growth phase long enough to gather  
305 sufficient metabolic resources to ensure robust flowering and seed filling (Achard et al.,  
306 2006; Achard et al., 2007; Wang et al., 2018). From this evolutionary perspective, it is  
307 beneficial that the control of flowering time and the physiological response to salinity stress  
308 are molecularly linked (Kazan and Lyons, 2016), in this case through the physical interaction  
309 and mutual regulation of GI, SOS2 and SOS3, to coordinately mount salt tolerance and  
310 postpone reproduction. That gibberellin GA4 counteracted salinity-induced late flowering (Li  
311 et al., 2007) supports the notion that delayed flowering is a pro-active, genetically ingrained  
312 stress response partly dependent on DELLA proteins (Achard et al., 2006).

313

### 314 **Photoperiod-dependent flowering under saline stress requires GI stabilization by** 315 **SOS3**

316 Previous studies have shown that salinity-induced delay in the flowering time of *Arabidopsis*  
317 occurs in a dosage dependent manner by reducing transcription of the floral integrators *CO*  
318 and *FT* (Kim et al., 2007; Li et al., 2007). The GI protein, a major regulator of photoperiodic-  
319 induced flowering through the CO-FT module, also plays a substantial role as a negative  
320 regulator in the SOS-mediated salt stress adaptation pathway by sequestering the SOS2  
321 kinase in the cytoplasm (Kim et al., 2013a). Salt induced degradation of GI results in the  
322 release of the SOS2 kinase, which in turn makes a complex with SOS3 that is recruited to  
323 the plasma membrane for the activation of  $\text{Na}^+/\text{H}^+$  antiporter SOS1 (Kim et al., 2013a;  
324 Quintero et al., 2002). The *gi-1* mutant exhibits a de-repressed SOS pathway and

325 exceptional salt tolerance compared to the wild type. Despite the multiplicity of functions of  
326 SOS2 in various processes pertinent to adaptation to salinity (Qiu et al., 2004; Cheng et al.,  
327 2004; Batelli et al., 2007), SOS2 does not seem to play a significant role in setting the  
328 flowering time of Arabidopsis on its own (Li et al., 2007; Kim et al., 2013a). However, our  
329 study reveals that SOS3, a critical regulator of SOS2, does modulate the initiation of  
330 flowering under salt stress by binding to and stabilizing GI. We show that the salt-dependent  
331 GI degradation previously reported mostly occurs in the cytosol, whereas the nuclear pool of  
332 GI is preserved by a mechanism that involves its physical interaction with SOS3 (Figure 2  
333 and Supplemental Figure S2). The abundance of the nuclear pool of the GI protein is  
334 drastically reduced in salt-treated *sos3-1* plants, which produces a mutated SOS3 protein  
335 unable to interact with GI (Figures 2 and 3). Nuclear localization of the GI-SOS3 complex  
336 was abolished in plants expressing the non-S-acylatable SOS3-C3A protein that remained  
337 outside the nucleus (Figures 5, 6 and Supplemental Figure S5). Only the nucleus-localized  
338 GI is competent to promote flowering (Kim et al., 2013b), and thus the salt-induced flowering  
339 delay of the *gi-2* mutant was rescued by expression of the *GI-NLS* protein that preferentially  
340 partitions into the nucleus (Figure 2). Together, these results indicate that SOS3 promotes  
341 the stabilization of nuclear GI during salt stress and explain why *GI* overexpression was  
342 unable to rescue the salt-dependent late flowering of *sos3-1* plants (Figure 1).

343

#### 344 **S-acylation promotes nuclear import of SOS3**

345 SOS2/CIPK24 and SOS3/CBL4 belong to a large array of Ca<sup>2+</sup>-dependent protein kinase  
346 modules comprising CIPK and CBL subunits that associate with variable specificity. Post-  
347 translational modifications of the CBL subunits determine the subcellular localization of the  
348 CIPK-CBL modules (Batistič et al., 2010; Luan et al., 2002). Dual fatty acid modifications  
349 consisting of N-myristoylation and S-acylation that contribute to differential sorting of CBLs  
350 are only found in CBL1, SOS3/CBL4, CBL5 and CBL9 among the ten CBL proteins of  
351 Arabidopsis (Batistič et al., 2010; Batistič et al., 2008). In dual fatty acid modifications, N-



352 terminal myristoylation often provides anchorage to cell membranes. Indeed, myristoylation  
353 of SOS3 at Gly-2 allows the SOS2-SOS3 complex to associate with the plasma membrane  
354 and phosphorylate SOS1 to promote Na<sup>+</sup>/H<sup>+</sup> antiport activity and Na<sup>+</sup> efflux (Quintero et al.,  
355 2002). S-acylation of the cysteine residue adjacent to the myristoylated glycine is thought to  
356 enhance the membrane attachment of CBL proteins and to regulate subcellular trafficking  
357 from the ER to the plasma membrane (Held et al., 2011; Batistič et al., 2008; Batistič and  
358 Kudla, 2004; Saito et al., 2018). For instance, the CBL4-CIPK6 complex modulates the K<sup>+</sup>  
359 channel function of AKT2 by promoting its sorting from the ER to the PM (Held et al., 2011).  
360 Mutants in each of the three components of this functional module, *cbl4*, *cipk6* and *akt2*,  
361 exhibit delayed flowering only in short-day conditions but not in LDs (Held et al., 2011). The  
362 floral regulators that were altered in these mutants were not investigated and thus the  
363 precise molecular and biochemical connection between K<sup>+</sup> status and flowering time  
364 remains unknown. Here we show that S-acylation of SOS3 is a requisite for nuclear import  
365 to secure flowering under LD and saline conditions. Mutation of the S-acylation site (SOS3-  
366 C3A) or biochemical inhibition with 2-BrP impeded translocation to the nucleus (Figure 6),  
367 and restricted the interaction of SOS3-C3A with SOS2 and GI to the cytoplasm or the  
368 perinuclear rim, respectively (Figure 5D and Supplemental Figure S5). The SOS3-C3A  
369 mutant was unable to complement the salt-dependent late flowering of the *sos3-1* mutant,  
370 whereas SOS3 and SOS3-G2A localized to the nucleus, interacted with GI and supported  
371 flowering. Reciprocally, SOS3-C3A was able to suppress most of the salt-sensitivity of *sos3-1*,  
372 whereas the non-myristoylatable mutant SOS3-G2A could not (Supplemental Figure S6).  
373 This indicates that S-acylation of SOS3 is specifically important for flowering under salt  
374 stress but dispensable for salt tolerance. In conclusion, S-acylation targets SOS3 to the  
375 nucleus where it forms a complex with GI and helps initiate flowering, whereas cytoplasmic  
376 SOS3 functions in the SOS pathway to help establish salt tolerance (Figure 7D).

377 Eukaryotic palmitoyl-acyl transferases (PATs) of the DHHC (Asp-His-His-Cys) family  
378 catalyze protein S-acylation (Batistič, 2012; Hemsley, 2020). In turn, thioesterases break

379 down the ester bond of S-acylation and release the fatty acid. The unique reversibility of  
380 protein S-acylation allows proteins to rapidly change their location between intracellular  
381 compartments (Aicart-Ramos et al., 2011; Hemsley, 2020). Conditional S-acylation is known  
382 to serve as lipid anchor at membranes to immobilize and restrain proteins from entering the  
383 nucleus (Hemsley, 2020; Eisenhaber et al., 2011; Lott et al., 2011). For instance, the  
384 osmotic-stress responsive transcription factor NFAT5a is myristoylated, S-acylated and  
385 sorted to the plasma membrane of animal cells. Upon osmotic stress, NFAT5a moves into  
386 the nucleus by a mechanism likely involving de-S-acylation (Eisenhaber et al., 2011), which  
387 is the reverse to the novel mechanism we report here for SOS3 nuclear import. To date  
388 there is no molecular mechanism known to control nuclear import of a lipid-modified protein  
389 in a regulated manner (Aicart-Ramos et al., 2011; Chamberlain and Shipston, 2015). SOS3  
390 lacks canonical nuclear localization signals, which suggests that SOS3 enters the nucleus  
391 assisted by a shuttle or gateway protein, whose interaction is presumably dependent on the  
392 S-acylation status of SOS3. The finding that non-S-acylated SOS3 was still able to interact  
393 with GI and that the complex was detected at the nuclear rim discards the trivial possibility  
394 that GI shuttles SOS3 to the nucleus as a complex. While SOS3 S-acylation is a strict  
395 requirement for nuclear recruitment, it remains unknown whether SOS3 undergoes de-S-  
396 acylation when entering the nucleus or is processed therein. We posit a model (Figure 7D) in  
397 which a fraction of the SOS3 protein is S-acylated and partitioned into the nucleus. Upon  
398 salinity stress, a  $\text{Ca}^{2+}$  spike would activate SOS3, fostering the interaction with GI since  $\text{Ca}^{2+}$   
399 supplementation strengthened SOS3-GI interaction. Simultaneously, the N-myristoylated but  
400 non-S-acylated SOS3 remaining in the cytosol recruits SOS2 to activate SOS1 (Quintero et  
401 al., 2002). Quantitative data in Figure 6F indicates that salinity stress enhances S-acylation  
402 and transfer of SOS3 to the nuclear pool relative to the whole cell content, a process that  
403 was blocked *in vivo* by the PAT inhibitor 2-BrP.

404 Often, protein S-acylation is concurrent with myristoylation or prenylation because  
405 substrate proteins for palmitoyl-S-transferases (PATs) must be attached to or in the vicinity

406 of membranes (Rana et al., 2018). However, N-myristoylation is not a biochemical  
407 requirement for eukaryotic PATs since S-acylation can occur throughout the target protein.  
408 Indeed, the non-myristoylatable SOS3 mutant G2A, but not the double mutant G2A/C3A,  
409 was still S-acylated, in tobacco and yeast (Figure 4). Moreover, the SOS3-G2A protein was  
410 readily detected in *Arabidopsis* nuclei (Figure 6). Understanding the environmental and  
411 biochemical inputs that elicit S-acylation (and de-S-acylation) of SOS3, and identify the  
412 PATs involved in this process (24 putative *PAT* genes in *Arabidopsis*) will be a promising  
413 line of research. PAT10 functions in salt tolerance, polar growth of root hairs, and stomatal  
414 movements in *Arabidopsis* (Song et al., 2018; Zhou et al., 2013; Zhang et al., 2015), but  
415 PAT10 is tonoplast-localized and unlikely to mediate SOS3 palmitoylation. Moreover,  
416 palmitoylation of CBL2 and CBL3 by PAT10 results in the attachment of these target CBLs  
417 to the tonoplast (Song et al., 2018). The presence of a PAT localized in the nuclear envelope  
418 or in the perinuclear ER membrane (Batistič, 2012) and driving the palmitoylation-dependent  
419 nuclear import of SOS3 is an attractive possibility.

420

### 421 **SOS3 ensures GI-mediated flowering under salt stress**

422 Salinity stress delays flowering due to GI degradation (Kim et al., 2013a) and the reduced  
423 transcription of the floral integrators *CO* and *FT* (Kim et al., 2007; Li et al., 2007). Here we  
424 show that nuclear GI is more recalcitrant to degradation than cytosolic GI since the GI-SOS3  
425 complex is stable inside the nucleus. Removal of SOS3 destabilizes nuclear GI and delays  
426 flowering even further. Thus, a novel function of SOS3 is to ensure that flowering will occur  
427 in a saline environment, albeit at a later time compared to non-stressing conditions.  
428 Ultimately, the developmental transition to flowering requires the de-repression of *CO* and  
429 *FT*, and GI induces flowering mainly through the CO-FT module (Sawa et al., 2007; Sawa  
430 and Kay, 2011). Expression of *CO* under long days requires the degradation of repressors  
431 collectively known as CDFs that delay flowering by repressing *CO* transcription. A protein  
432 complex formed by GI and FKF1 promotes degradation CDFs (Imaizumi et al., 2005; Sawa

433 et al., 2007; Fornara et al., 2009; Nelson et al., 2000). Similarly to *gi* mutant, plants bearing  
434 the *fkf1* mutation lost the salt-induced flowering delay and flowered late unconditionally, with  
435 no statistical difference with and without salt stress (Supplemental Figure S8). These  
436 mutants also display increased salt tolerance, similar to *gi* mutants (Supplemental Figure  
437 S9). Even though SOS3 was able to interact with GI and FKF1 both in normal and saline  
438 conditions (Figure 7A), the association of SOS3 to the GI and FKF1 binding sites in the *CO*  
439 promoter region increased upon salt treatment, thereby leading to enhanced *CO* expression  
440 upon the onset of salt stress (Figure 1C). This result and the spinning disc confocal  
441 microscopy data (Figure 6E-F) support the notion that salt stress enhances nuclear import of  
442 SOS3 through S-acylation to promote the expression of *CO* (Figures 1 and 7). We have not  
443 yet investigated whether CDF repressors are displaced or degraded upon binding of the GI-  
444 FKF1-SOS3 complex.

445 *CO* and *FT* transcripts in *sos3-1* followed wild-type dynamics in non-saline conditions,  
446 but salt treatment reduced *CO* and abated *FT* transcript levels in the mutant (Figure 1C),  
447 indicating that SOS3 functions to sustain the expression of these two critical floral  
448 integrators. Our data confirms previous reports of reduced *FT* expression under salinity but  
449 are partially in conflict with the concomitant repression of *CO* that has been reported in wild-  
450 type *Arabidopsis* after several days (5-10 d) under saline stress (Li et al., 2007). However,  
451 Kilian et al. (2007) showed that with salt treatment given at ZT3, *CO* expression reached a  
452 maximum at ZT15 (dusk), but expression during the dark period was not recorded. Here, we  
453 analyzed the diurnal pattern of *CO* and *FT* upon the onset of saline treatment, coinciding  
454 with the beginning of the enhanced nuclear import of SOS3 (Figures 6 and 7). *CO*  
455 expression and *CO* protein abundance are known to be under multiple and complex layers  
456 of regulation (Shim et al., 2017), and the expression pattern could change along the process  
457 of salt-adaptation. Indeed, quantitation of *CO* and *FT* transcripts at 1- and 5-day showed that  
458 the salt- and genotype-dependent reduction in *FT* expression was more intense after 5 days  
459 in salt compared to 1 day, and that *CO* transcript abundance showed a similar trend after the

460 5-day treatment (Supplemental Figure S11). The negative impact of the *sos3-1* mutation  
461 was observed regardless of the duration of the salt treatment. The early increase in the  
462 abundance of *CO* transcript in the wild-type upon salt treatment and the opposing decrease  
463 in the *sos3-1* mutant is coherent with the model depicted in Figure 7D. In the wild-type, the  
464 nuclear pool of GI is not degraded but protected by the nuclear-imported SOS3 and,  
465 together with GI and FKF1, up-regulates *CO* transcription. However, in the *sos3-1* mutant,  
466 nuclear GI is also degraded and *CO* transcription is compromised. What ultimately  
467 determines floral commitment is *FT*, and our *FT* expression data is in agreement with  
468 delayed flowering in the wild-type and the acute delay in the *sos3-1* mutant (Figure 1).  
469 Although *CO* is a major transcriptional activator of *FT*, GI also promotes *FT* expression in a  
470 *CO*-independent manner (Jung et al., 2007; Sawa and Kay, 2011). Because GI protein  
471 abundance decreased the most in the *sos3-1* mutant under salt stress, a condition that  
472 reduced *CO* transcription and completely abated *FT* transcripts (Figure 1 and Supplemental  
473 Figure S11), it appears that *FT* transcription under saline stress is largely determined by GI  
474 abundance and only partly dependent on *CO*. It remains to be investigated whether the GI-  
475 FKF1-SOS3 complex also regulates *FT* transcription directly as with *CO*.

476 Altogether we have shown that the calcium-binding protein SOS3, that is an upstream  
477 regulator of the salt tolerance determinants SOS2 and SOS1, also functions to ensure the  
478 completion of flowering under salt stress by stabilizing the nuclear pool of GI and promoting  
479 the expression of *CO* (Figure 7D). These results add new layers of regulation and molecular  
480 connections to the mechanism that links salt stress adaptation and the photoperiodic  
481 flowering pathway. Our results also expand the repertoire of cellular processes in which  
482 SOS3 serves as an integrator transmitting environmental inputs leading to stress adaptation  
483 and transition to reproductive stage, and uncover a potentially novel mechanism for  
484 palmitoylation-dependent ingress of proteins into the nucleus.

485

## 486 **METHODS**

487

488 **Plant materials and flowering under salinity stress**

489 Mutants *sos1-1*, *sos2-2*, *sos3-1*, *cbi10/scabp8* (SALK\_056042), *gi-2*, and transgenic lines  
490 overexpressing tagged *GI-HA* (called *GI-OX*) have been described previously (Fowler et al.,  
491 1999; Ishitani et al., 2000; Quan et al., 2007). *Gipro:GI-GFP* (called *GI-GFP*), *Gipro:GI-GFP-*  
492 *NLS* (called *GI-NLS*), and *Gipro:GI-GFP-NES* (called *GI-NES*) transgenic plants in *gi-2*  
493 mutant background were kindly provided by Hong Gil Nam (Daegu Gyeongbuk Institute of  
494 Science and Technology, Korea) (Kim et al., 2013b). Transgenic lines expressing *SOS3*,  
495 *SOS3-G2A*, *SOS3-C3A*, and *SOS3-GFP* from the *35S* promoter, and the genomic construct  
496 *proSOS3:SOS3-GFP* were generated in the *sos3-1* background by floral dipping (further  
497 details are in Supplemental Information, under Plasmid Construction). Mutant lines  
498 *fkf1/ztl103*, *ztl103/lkp2* and *fkf1/lkp2/ztl103* were gently provided by Takato Imaizumi  
499 (University of Washington, USA) (Baudry et al., 2010). Lines *sos1-1 GI-OX*, *sos2-2 GI-OX*,  
500 *sos3-1 GI-OX* and *cbi10 GI-OX* were generated by crossing *GI-OX* transgenics with mutants  
501 *sos1-1*, *sos2-2*, *sos3-1* and *cbi10*. Plants were confirmed for late flowering and salt  
502 sensitivity, and further verified by PCR or western blot for *GI* expression.

503 All seeds were sterilized with 70% ethanol and 2% bleach (sodium hypochlorite  
504 solution) and stratified at 4°C for 2-3 days. Plants were grown under long-day (LD)  
505 conditions (16 h light / 8 h dark, 80-100  $\mu\text{M m}^{-2}\text{s}^{-1}$ ) at 23°C. For flowering phenotype seeds  
506 were first grown on full MS media (Duchefa, Haarlem, Netherlands) containing 1% sucrose  
507 (supplemented with vitamins, 2.5% phytigel) (Murashige and Skoog, 1962). Then 8-day old  
508 seedlings were transferred to MS media (basal salt MS without vitamins) with or without  
509 NaCl in plant culture dishes (14 cm in height; 10 cm in diameter) (SPL Life Science,  
510 Pocheon, Korea). Six plants were planted per plant dish with sufficient air exchange. Salt-  
511 treatments were adjusted depending on the genotype and the relative sensitivity or tolerance  
512 to salinity of plants used in each experiment, to ensure that plants survived the treatment

513 and flowered. The concentrations of NaCl used are indicated in the Figure legends. Total  
514 rosette leaf numbers were counted after bolting to indicate flowering time.

515

### 516 **Bimolecular fluorescence complementation (BiFC)**

517 Plasmid constructs for BiFC were transformed into *Agrobacterium tumefaciens* strain  
518 GV3101. Two days after *Agrobacterium* infiltration into tobacco leaves (see Supplemental  
519 Methods for details), solutions of 100 mM NaCl or 3 mM CaCl<sub>2</sub>, with or without 2 mM EGTA  
520 were infiltrated into tobacco epidermal cells, and 6-8 h later YFP signals were detected  
521 under confocal laser scanning microscope (FV 1000 Olympus, Tokyo, Japan). Excitation  
522 and emission wavelengths for YFP are 515 nm and 527 nm, respectively. The same settings  
523 were used for fluorescence detection in all the samples within the same experiment.

524

### 525 **Immunoblotting and immunoprecipitation**

526 Fused proteins GI-HA, SOS2-GFP, SOS3-MYC and MYC-SOS3-1 were transiently  
527 expressed in *N. benthamiana* leaves alone or in given combinations by *Agrobacterium*  
528 infiltration. Leaves were treated or untreated with 100 mM NaCl or 3 mM CaCl<sub>2</sub>. EGTA (2  
529 mM) was used as a calcium chelator to inhibit calcium signaling. Immunoblotting followed  
530 standard procedures (Kim et al., 2013a). Buffer composition is given in Supplemental  
531 Methods.

532 For immunoprecipitation, rat  $\alpha$ -HA (1:250, Roche, #11867423001, Indianapolis, IN) or  
533 Rabbit  $\alpha$ -GFP polyclonal (1:250, Invitrogen, #A11120) antibodies were pre-incubated with  
534 protein A agarose (Invitrogen) at 4°C for 30 min. Protein extracts were added and further  
535 incubated for 1 h at 4°C. Complexes were separated by SDS-PAGE. Each immunoblot was  
536 incubated with the appropriate primary antibody ( $\alpha$ -HA (1:2000),  $\alpha$ -GFP (1:5,000, Abcam,  
537 #ab6556, Cambridge, MA) or  $\alpha$ -MYC (1:1,000, Cell Signaling Technology, #2276, Danvers,  
538 MA) for 1 to 2 h at room temperature or overnight at 4°C. The antigen protein was detected

539 by chemiluminescence using an ECL-detecting reagent (Bio-Rad, Hercules, CA) and signals  
540 were detected by Imaging system (ChemiDoc<sup>TM</sup>MP, Bio-Rad).

541

#### 542 **Nucleus preparation**

543 To test salt-induced degradation of cytosolic and nuclear GI protein, 12-day old Arabidopsis  
544 *GI-OX*, *sos3-1 GI-OX* and *sos2-2 GI-OX* were treated with or without 100 mM NaCl in  
545 distilled water for 12 h. To determine the subcellular localization of SOS3, SOS3-G2A and  
546 SOS3-C3A proteins, aerial parts of 4-week old *sos3-1* plants expressing these proteins were  
547 collected for fractionation of nuclear and cytosolic proteins. Nuclei were purified using Plant  
548 Nuclei Isolation/extraction Kit (Sigma) and proteins extracted with Laemmli buffer. Cytosolic  
549 proteins were obtained by precipitating supernatants of the first nuclei pelleting step with  
550 10% TCA and resuspending in a denaturing buffer consisting of 50 mM Tris-HCl (pH 7.8), 4  
551 M urea, 2% SDS and 2.5% glycerol. Commercially available antibodies against  $\alpha$ -Histon3  
552 (Abcam, #ab1791) and  $\alpha$ -Phospho Enol Pyruvate Carboxylase (PEPC) (Agrisera, #AS09  
553 458, Vännäs, Sweden) were used as nuclear and cytosolic markers, respectively.

554

#### 555 **Detection of SOS3 S-acylation by differential alkylation**

556 Wild-type SOS3 and mutant proteins G2A, C3A and G2A/C3A, all with 6xHis tags, were  
557 expressed in yeast. Protein extracts were first treated with N-ethylmaleimide (NEM) to block  
558 free cysteine thiols, next with hydroxylamine to break palmitoyl-thioester bonds, and then  
559 with methyl-PEG<sub>24</sub>-maleimide, MM(PEG)<sub>24</sub>, to alkylate newly formed cysteine thiols.  
560 Chemicals and detailed procedure are in Supplemental Methods. Proteins were resolved in  
561 11% acrylamide SDS-PAGE gels and subjected to western blot analysis using the  $\alpha$ -SOS3  
562 antibody (Ishitani et al., 2000) at 1:2000 dilution. The theoretical mass of SOS3 with 6x His  
563 tag is 26.5 kDa and MM(PEG)<sub>24</sub> adds 1.24 kDa for each cysteine alkylated.

564

#### 565 **Acyl resin-assisted capture (acyl-RAC) of SOS3**



566 The wild-type SOS3 and mutants G2A, C3A and G2A/C3A were tagged C-terminally with a  
567 Tandem Affinity Purification (TAP) tag and expressed in *N. benthamiana* leaves. Proteins  
568 extracted from leaf tissue were processed following the acyl-RAC method as described by  
569 Chai et al (2019); the detailed procedure is given Supplemental Methods. Before sample  
570 processing, aliquots were withdrawn to be analyzed as “input”. Protein samples were divided  
571 in two parts and hydroxylamine was added at 0.5 M final concentrations to one of these  
572 parts to break S-acyl-thioester bonds, whereas the other served as untreated control. Each  
573 sample was incubated with thiopropyl-sepharose 6B resin (Sigma) to link proteins with free  
574 thiols. Protein eluted with a DTT-containing buffer were analyzed by western blotting with the  
575  $\alpha$ -SOS3 antibody.

576

#### 577 **2-Bromo-palmitate treatment and microscopy**

578 Plants were sown in ½ MS plates with 1% sucrose in a LD chamber at 21°C. Five days after  
579 germination the plant were incubated in liquid in ½ MS with 1% sucrose media with or  
580 without 50  $\mu$ M 2-bromopalmitate (2-BrP; Sigma-Aldrich), and with or without 100 mM NaCl,  
581 for 24 h keeping the same growth conditions. For controls, a mock treatment with the same  
582 volume of ethanol (2-BrP solvent) was added to samples without 2-BrP. Details about  
583 treatments and microscopy are given in Supplemental Methods.

584

#### 585 **RNA isolation and Q-RT PCR**

586 Gene expression was analyzed by quantitative RT-PCR as detailed in Supplemental  
587 Methods. Each data point represents the average of three independent amplifications of the  
588 same RNA sample run in the same reaction plate. Each biological replicate had three  
589 technical replicas. Primers used for Q-RT PCR are in Supplemental Table S1.

590

#### 591 **Chromatin immunoprecipitation (ChIP) assay**

592 Two-week old Arabidopsis seedlings (*GI-GFPox* and *SOS3-GFPox*) treated with 100 mM  
593 NaCl for 10 h were used for the ChiP assay. Procedures of fixation and isolation of  
594 chromatin were performed as described (Sawa et al., 2007; Saleh et al., 2008). Detailed  
595 description can be found in Supplemental Methods.

596

### 597 **Statistical analyses**

598 The statistical analysis used to obtain the significance level is indicated in the legend to each  
599 figure. The different statistical analyses were performed using GraphPad Prism version 8,  
600 GraphPad Software, San Diego, California USA, [www.graphpad.com](http://www.graphpad.com).

601

### 602 **FUNDING**

603 This work was supported by grants from the National Research Foundation (NFR) of Korea  
604 funded by the Korean Government (MSIP 2016R1A2A1A05004931 and Global Research  
605 Laboratory 2017K1A1A2013146) and by the Next-Generation BioGreen 21 Program SSAC  
606 Grants PJ01318201 (to D-J.Y.), PJ01318205 (to J.M.P.), and PJ01327301 (to W-Y.K.),  
607 Rural Development Administration, Republic of Korea. H. J. P was supported by the NRF  
608 grant NRF-2019R111A1A01041422, Ministry of Education, Korea. F.J.Q. was supported by  
609 grants BIO2015-70946 and PID2019-109664RB-100 from Agencia Estatal de Investigacion,  
610 Spain, and co-financed by the European Regional Development Fund. C.S-R. was  
611 supported by ETH Zurich. Live cell imaging was performed with equipment maintained by  
612 the Center for Microscopy and Image Analysis (University of Zurich) and Scientific Center for  
613 Optical and Electron Microscopy (ScopeM, ETH Zurich). J.M.P., F.J.Q and C.S-R. had  
614 additional support by the collaborative research grant BIO2016-81957-REDT from Agencia  
615 Estatal de Investigacion, Spain.

616

### 617 **AUTHOR CONTRIBUTIONS**

618 H.J. Park, R. Aman and C.J. Lim performed the experiments related to flowering time and  
619 protein interactions. F. Gámez, I. Villalta, E. Garcia, M. Lindahl, R. Carranco, and F.J.  
620 Quintero determined the acylation, subcellular localization and the salt-tolerance function of  
621 wild-type and mutant SOS3 proteins. H.J. Park, F. Gámez, C. Sánchez-Rodríguez, F.J.  
622 Quintero, J.M. Pardo, and W.-Y. Kim designed experiments and analyzed data. R.A.  
623 Bressan and S.Y. Lee discussed data. H.J. Park, F. Gámez, J.M. Pardo, F.J. Quintero and  
624 D.J. Yun wrote the manuscript. J.M. Pardo, W.-Y. Kim, C. Sánchez-Rodríguez, F.J. Quintero  
625 and D.-J. Yun supervised the project.

626

## 627 **ACKNOWLEDGMENT**

628 We thank Hong Gil Nam (Daegu Gyeongbuk Institute of Science and Technology, Korea)  
629 and Takato Imaizumi (University of Washington, USA) for *Glpro:GI-GFP* (called *GI-GFP*),  
630 *Glpro:GI-GFP-NLS* (called *GI-NLS*), and *Glpro:GI-GFP-NES* (called *GI-NES*) transgenic  
631 plant seeds, and *fkf1/ztl103*, *ztl103/lkp2* and *fkf1/lkp2/ztl103* mutant seeds, respectively.

632

633 **References**

- 634 Achard, P., Cheng, H., De Grauwe, L., Decat, J., Schoutteten, H., Moritz, T., Van Der  
635 Straeten, D., Peng, J., and Harberd, N. P. (2006). Integration of plant responses to  
636 environmentally activated phytohormonal signals. *Science* 311:91–94.
- 637 Achard, P., Baghour, M., Chapple, A., Hedden, P., Van Der Straeten, D., Genschik, P.,  
638 Moritz, T., and Harberd, N. P. (2007). The plant stress hormone ethylene controls  
639 floral transition via DELLA-dependent regulation of floral meristem-identity genes.  
640 *Proc. Natl. Acad. Sci.* 104:6484–6489.
- 641 Aicart-Ramos, C., Valero, R. A., and Rodriguez-Crespo, I. (2011). Protein palmitoylation and  
642 subcellular trafficking. *Biochim. Biophys. Acta BBA - Biomembr.* 1808:2981–2994.
- 643 Barragán, V., Leidi, E. O., Andrés, Z., Rubio, L., De Luca, A., Fernández, J. A., Cubero, B.,  
644 and Pardo, J. M. (2012). Ion exchangers NHX1 and NHX2 mediate active potassium  
645 uptake into vacuoles to regulate cell turgor and stomatal function in Arabidopsis.  
646 *Plant Cell* 24:1127–1142.
- 647 Batelli, G., Verslues, P. E., Agius, F., Qiu, Q., Fujii, H., Pan, S., Schumaker, K. S., Grillo, S.,  
648 and Zhu, J.-K. (2007). SOS2 promotes salt tolerance in part by interacting with the  
649 vacuolar H<sup>+</sup>-ATPase and upregulating its transport activity. *Mol. Cell. Biol.* 27:7781–  
650 7790.
- 651 Batistič, O. (2012). Genomics and localization of the Arabidopsis DHHC-Cysteine-Rich  
652 Domain S-Acyltransferase protein family. *Plant Physiol.* 160:1597–1612.
- 653 Batistič, O., and Kudla, J. (2004). Integration and channeling of calcium signaling through  
654 the CBL calcium sensor/CIPK protein kinase network. *Planta* 219:915–924.
- 655 Batistič, O., Sorek, N., Schültke, S., Yalovsky, S., and Kudla, J. (2008). Dual fatty acyl  
656 modification determines the localization and plasma membrane targeting of  
657 CBL/CIPK Ca<sup>2+</sup> signaling complexes in Arabidopsis. *Plant Cell* 20:1346–1362.
- 658 Batistič, O., Waadt, R., Steinhorst, L., Held, K., and Kudla, J. (2010). CBL-mediated  
659 targeting of CIPKs facilitates the decoding of calcium signals emanating from distinct  
660 cellular stores. *Plant J.* 61:211–222.
- 661 Baudry, A., Ito, S., Song, Y. H., Strait, A. A., Kiba, T., Lu, S., Henriques, R., Pruneda-Paz, J.  
662 L., Chua, N.-H., Tobin, E. M., et al. (2010). F-Box Proteins FKF1 and LKP2 Act in  
663 Concert with ZEITLUPE to Control Arabidopsis Clock Progression. *Plant Cell*  
664 22:606–622.
- 665 Brunelli, J. P., and Pall, M. L. (1993). A series of yeast shuttle vectors for expression of  
666 cDNAs and other DNA sequences. *Yeast* 9:1299–1308.
- 667 Cao, S., Ye, M., and Jiang, S. (2005). Involvement of GIGANTEA gene in the regulation of  
668 the cold stress response in Arabidopsis. *Plant Cell Rep.* 24:683–690.
- 669 Cerdan, P. D., and Chory, J. (2003). Regulation of flowering time by light quality. *Nature*  
670 423:881–885.

- 671 Chai, S., Ge, F.-R., Zhang, Y., and Li, S. (2019). S-acylation of CBL10/SCaBP8 by PAT10 is  
672 crucial for its tonoplast association and function in salt tolerance. *J. Integr. Plant Biol.*  
673 62:718–722.
- 674 Chamberlain, L. H., and Shipston, M. J. (2015). The physiology of protein S-acylation.  
675 *Physiol. Rev.* 95:341–376.
- 676 Cheng, N.-H., Pittman, J. K., Zhu, J.-K., and Hirschi, K. D. (2004). The protein kinase SOS2  
677 activates the Arabidopsis  $H^+/Ca^{2+}$  antiporter CAX1 to integrate calcium transport and  
678 salt tolerance. *J. Biol. Chem.* 279:2922–2926.
- 679 Corbesier, L., and Coupland, G. (2006). The quest for florigen: a review of recent progress.  
680 *J. Exp. Bot.* 57:3395–3403.
- 681 Dalchau, N., Baek, S. J., Briggs, H. M., Robertson, F. C., Dodd, A. N., Gardner, M. J.,  
682 Stancombe, M. A., Haydon, M. J., Stan, G.-B., Gonçalves, J. M., et al. (2011). The  
683 circadian oscillator gene GIGANTEA mediates a long-term response of the  
684 *Arabidopsis thaliana* circadian clock to sucrose. *Proc. Natl. Acad. Sci.* 108:5104–  
685 5109.
- 686 David, K. M., Armbruster, U., Tama, N., and Putterill, J. (2006). Arabidopsis GIGANTEA  
687 protein is post-transcriptionally regulated by light and dark. *FEBS Lett.* 580:1193–  
688 1197.
- 689 Eisenhaber, B., Sammer, M., Lua, W. H., Benetka, W., Liew, L. L., Yu, W., Lee, H. K.,  
690 Koranda, M., Eisenhaber, F., and Adhikari, S. (2011). Nuclear import of a lipid-  
691 modified transcription factor: Mobilization of NFAT5 isoform a by osmotic stress. *Cell*  
692 *Cycle* 10:3897–3911.
- 693 El Mahi, H., Pérez-Hormaeche, J., De Luca, A., Villalta, I., Espartero, J., Gámez-Arjona, F.,  
694 Fernández, J. L., Bundó, M., Mendoza, I., Mieulet, D., et al. (2019). A critical role of  
695 sodium flux via the plasma membrane  $Na^+/H^+$  exchanger SOS1 in the salt tolerance  
696 of rice. *Plant Physiol.* 180:1046–1065.
- 697 Fornara, F., Panigrahi, K. C. S., Gissot, L., Sauerbrunn, N., Rühl, M., Jarillo, J. A., and  
698 Coupland, G. (2009). Arabidopsis DOF transcription factors act redundantly to  
699 reduce CONSTANS expression and are essential for a photoperiodic flowering  
700 response. *Dev. Cell* 17:75–86.
- 701 Fornara, F., de Montaigu, A., Sánchez-Villarreal, A., Takahashi, Y., Ver Loren van Themaat,  
702 E., Huettel, B., Davis, S. J., and Coupland, G. (2015). The GI–CDF module of  
703 Arabidopsis affects freezing tolerance and growth as well as flowering. *Plant J.*  
704 81:695–706.
- 705 Fowler, S., Lee, K., Onouchi, H., Samach, A., Richardson, K., Morris, B., Coupland, G., and  
706 Putterill, J. (1999). GIGANTEA: a circadian clock-controlled gene that regulates  
707 photoperiodic flowering in Arabidopsis and encodes a protein with several possible  
708 membrane-spanning domains. *EMBO J.* 18:4679–4688.
- 709 Greenham, K., and McClung, C. R. (2015). Integrating circadian dynamics with physiological  
710 processes in plants. *Nat. Rev. Genet.* 16:598–610.

- 711 Han, Y., Zhang, X., Wang, Y., and Ming, F. (2013). The Suppression of WRKY44 by  
712 GIGANTEA-miR172 Pathway Is Involved in Drought Response of *Arabidopsis*  
713 *thaliana*. *PLOS One* 8:e73541.
- 714 Held, K., Pascaud, F., Eckert, C., Gajdanowicz, P., Hashimoto, K., Corratgé-Faillie, C.,  
715 Offenborn, J. N., Lacombe, B., Dreyer, I., Thibaud, J.-B., et al. (2011). Calcium-  
716 dependent modulation and plasma membrane targeting of the AKT2 potassium  
717 channel by the CBL4/CIPK6 calcium sensor/protein kinase complex. *Cell Res.*  
718 21:1116–1130.
- 719 Hemsley, P. A. (2020). S-acylation in plants: an expanding field. *Biochem. Soc. Trans.*  
720 48:529–536.
- 721 Imaizumi, T., Schultz, T. F., Harmon, F. G., Ho, L. A., and Kay, S. A. (2005). FKF1 F-Box  
722 protein mediates cyclic degradation of a repressor of CONSTANS in *Arabidopsis*.  
723 *Science* 309:293–297.
- 724 Ishitani, M., Liu, J., Halfter, U., Kim, C.-S., Shi, W., and Zhu, J.-K. (2000). SOS3 function in  
725 plant salt tolerance requires N-myristoylation and calcium binding. *Plant Cell*  
726 12:1667–1677.
- 727 Ji, H., Pardo, J. M., Batelli, G., Van Oosten, M. J., Bressan, R. A., and Li, X. (2013). The Salt  
728 Overly Sensitive (SOS) pathway: Established and emerging roles. *Mol. Plant* 6:275–  
729 286.
- 730 Jung, J.-H., Seo, Y.-H., Seo, P. J., Reyes, J. L., Yun, J., Chua, N.-H., and Park, C.-M.  
731 (2007). The GIGANTEA-regulated microRNA172 mediates photoperiodic flowering  
732 independent of CONSTANS in *Arabidopsis*. *Plant Cell* 19:2736–2748.
- 733 Kazan, K., and Lyons, R. (2016). The link between flowering time and stress tolerance. *J.*  
734 *Exp. Bot.* 67:47–60.
- 735 Kilian, J., Whitehead, D., Horak, J., Wanke, D., Weinl, S., Batistic, O., D'Angelo, C.,  
736 Bornberg-Bauer, E., Kudla, J., and Harter, K. (2007). The AtGenExpress global  
737 stress expression data set: protocols, evaluation and model data analysis of UV-B  
738 light, drought and cold stress responses. *Plant J.* 50:347–363.
- 739 Kim, S.-G., Kim, S.-Y., and Park, C.-M. (2007). A membrane-associated NAC transcription  
740 factor regulates salt-responsive flowering via FLOWERING LOCUS T in *Arabidopsis*.  
741 *Planta* 226:647–654.
- 742 Kim, W.-Y., Ali, Z., Park, H. J., Park, S. J., Cha, J.-Y., Perez-Hormaeche, J., Quintero, F. J.,  
743 Shin, G., Kim, M. R., Qiang, Z., et al. (2013a). Release of SOS2 kinase from  
744 sequestration with GIGANTEA determines salt tolerance in *Arabidopsis*. *Nat.*  
745 *Commun.* 4:1352.
- 746 Kim, Y., Han, S., Yeom, M., Kim, H., Lim, J., Cha, J.-Y., Kim, W.-Y., Somers, D. E., Putterill,  
747 J., Nam, H. G., et al. (2013b). Balanced nucleocytoplasmic partitioning defines a spatial  
748 network to coordinate circadian physiology in plants. *Dev. Cell* 26:73–85.
- 749 Kiyosue, T., and Wada, M. (2000). LKP1 (LOV kelch protein 1): a factor involved in the  
750 regulation of flowering time in *Arabidopsis*. *Plant J.* 23:807–815.

- 751 Lakatos, L., Szittyá, G., Silhavy, D., and Burgyán, J. (2004). Molecular mechanism of RNA  
752 silencing suppression mediated by p19 protein of tombusviruses. *EMBO J.* 23:876–  
753 884.
- 754 Li, K., Wang, Y., Han, C., Zhang, W., Jia, H., and Li, X. (2007). GA signaling and CO/FT  
755 regulatory module mediate salt-induced late flowering in *Arabidopsis thaliana*. *Plant*  
756 *Growth Regul.* 53:195–206.
- 757 Liu, J., and Zhu, J.-K. (1998). A calcium sensor homolog required for plant salt tolerance.  
758 *Science* 280:1943–1945.
- 759 Lott, K., Bhardwaj, A., Sims, P. J., and Cingolani, G. (2011). A minimal nuclear localization  
760 signal (NLS) in human phospholipid scramblase 4 that binds only the minor NLS-  
761 binding site of importin  $\alpha 1$ . *J. Biol. Chem.* 286:28160–28169.
- 762 Luan, S., Kudla, J., Rodriguez-Concepcion, M., Yalovsky, S., and Grissem, W. (2002).  
763 Calmodulins and Calcineurin B-like proteins: Calcium sensors for specific signal  
764 response coupling in plants. *Plant Cell* 14:s389–s400.
- 765 Maggio, A., Bressan, R., Zhao, Y., Park, J., and Yun, D.-J. (2018). It's hard to avoid  
766 avoidance: Uncoupling the evolutionary connection between plant growth,  
767 productivity and stress "tolerance." *Int. J. Mol. Sci.* 19:3671.
- 768 Mathieu, J., Yant, L. J., Mürdter, F., Küttner, F., and Schmid, M. (2009). Repression of  
769 flowering by the miR172 target SMZ. *PLoS Biol.* 7:e1000148.
- 770 Munns, R., and Tester, M. (2008). Mechanisms of salinity tolerance. *Annu. Rev. Plant Biol.*  
771 59:651–681.
- 772 Murashige, T., and Skoog, F. (1962). A revised medium for rapid growth and bioassays with  
773 tobacco tissue cultures. *Physiol. Plant* 15:473–497.
- 774 Nelson, D. C., Lasswell, J., Rogg, L. E., Cohen, M. A., and Bartel, B. (2000). FKF1, a clock-  
775 controlled gene that regulates the transition to flowering in *Arabidopsis*. *Cell*  
776 101:331–340.
- 777 Oliverio, K. A., Crepy, M., Martin-Tryon, E. L., Milich, R., Harmer, S. L., Putterill, J.,  
778 Yanovsky, M. J., and Casal, J. J. (2007). GIGANTEA regulates Phytochrome A-  
779 mediated photomorphogenesis independently of its role in the circadian clock. *Plant*  
780 *Physiol.* 144:495–502.
- 781 Park, H. J., Kim, W.-Y., Pardo, J. M., and Yun, D.-J. (2016). Chapter eight - Molecular  
782 interactions between flowering time and abiotic stress pathways. In *International*  
783 *Review of Cell and Molecular Biology* (ed. Kwang W. Jeon and Lorenzo Galluzzi, pp.  
784 371–412. Academic Press.
- 785 Qiu, Q.-S., Guo, Y., Dietrich, M. A., Schumaker, K. S., and Zhu, J.-K. (2002). Regulation of  
786 SOS1, a plasma membrane  $\text{Na}^+/\text{H}^+$  exchanger in *Arabidopsis thaliana*, by SOS2 and  
787 SOS3. *Proc. Natl. Acad. Sci.* 99:8436–8441.
- 788 Qiu, Q.-S., Guo, Y., Quintero, F. J., Pardo, J. M., Schumaker, K. S., and Zhu, J.-K. (2004).  
789 Regulation of vacuolar  $\text{Na}^+/\text{H}^+$  exchange in *Arabidopsis thaliana* by the Salt-Overly-  
790 Sensitive (SOS) pathway. *J. Biol. Chem.* 279:207–215.

- 791 Quan, R., Lin, H., Mendoza, I., Zhang, Y., Cao, W., Yang, Y., Shang, M., Chen, S., Pardo, J.  
792 M., and Guo, Y. (2007). SCABP8/CBL10, a putative calcium sensor, interacts with  
793 the protein kinase SOS2 to protect Arabidopsis shoots from salt stress. *Plant Cell*  
794 19:1415–1431.
- 795 Quintero, F. J., Ohta, M., Shi, H., Zhu, J.-K., and Pardo, J. M. (2002). Reconstitution in yeast  
796 of the Arabidopsis SOS signaling pathway for Na<sup>+</sup> homeostasis. *Proc. Natl. Acad.*  
797 *Sci.* 99:9061–9066.
- 798 Quintero, F. J., Martinez-Atienza, J., Villalta, I., Jiang, X., Kim, W.-Y., Ali, Z., Fujii, H.,  
799 Mendoza, I., Yun, D.-J., Zhu, J.-K., et al. (2011). Activation of the plasma membrane  
800 Na/H antiporter Salt-Overly-Sensitive 1 (SOS1) by phosphorylation of an auto-  
801 inhibitory C-terminal domain. *Proc. Natl. Acad. Sci.* 108:2611–2616.
- 802 Rana, M. S., Kumar, P., Lee, C.-J., Verardi, R., Rajashankar, K. R., and Banerjee, A. (2018).  
803 Fatty acyl recognition and transfer by an integral membrane S-acyltransferase.  
804 *Science* 359:eaao6326.
- 805 Riboni, M., Galbiati, M., Tonelli, C., and Conti, L. (2013). GIGANTEA enables drought  
806 escape response via abscisic acid-dependent activation of the florigens and  
807 SUPPRESSOR OF OVEREXPRESSION OF CONSTANS1. *Plant Physiol.*  
808 162:1706–1719.
- 809 Ryu, J. Y., Lee, H.-J., Seo, P. J., Jung, J.-H., Ahn, J. H., and Park, C.-M. (2014). The  
810 Arabidopsis floral repressor BFT delays flowering by competing with FT for FD  
811 binding under high salinity. *Mol. Plant* 7:377–387.
- 812 Saito, S., Hamamoto, S., Moriya, K., Matsuura, A., Sato, Y., Muto, J., Noguchi, H.,  
813 Yamauchi, S., Tozawa, Y., Ueda, M., et al. (2018). N-myristoylation and S-acylation  
814 are common modifications of Ca<sup>2+</sup>-regulated Arabidopsis kinases and are required  
815 for activation of the SLAC1 anion channel. *New Phytol.* 218:1504–1521.
- 816 Sawa, M., and Kay, S. A. (2011). GIGANTEA directly activates Flowering Locus T in  
817 *Arabidopsis thaliana*. *Proc. Natl. Acad. Sci.* 108:11698–11703.
- 818 Sawa, M., Nusinow, D. A., Kay, S. A., and Imaizumi, T. (2007). FKF1 and GIGANTEA  
819 complex formation is required for day-length measurement in Arabidopsis. *Science*  
820 318:261–265.
- 821 Seo, P. J., and Mas, P. (2015). STRESSing the role of the plant circadian clock. *Trends*  
822 *Plant Sci.* 20:230–237.
- 823 Shim, J. S., Kubota, A., and Imaizumi, T. (2017). Circadian clock and photoperiodic  
824 flowering in Arabidopsis: CONSTANS is a hub for signal integration. *Plant Physiol.*  
825 173:5.
- 826 Somers, D. E., Kim, W.-Y., and Geng, R. (2004). The F-Box protein ZEITLUPE confers  
827 dosage-dependent control on the circadian clock, photomorphogenesis, and  
828 flowering time. *Plant Cell* 16:769–782.
- 829 Song, S.-J., Feng, Q.-N., Li, C.-L., Li, E., Liu, Q., Kang, H., Zhang, W., Zhang, Y., and Li, S.  
830 (2018). A tonoplast-associated calcium-signaling module dampens ABA signaling  
831 during stomatal movement. *Plant Physiol.* 177:1666.



- 832 Suarez-Lopez, P., Wheatley, K., Robson, F., Onouchi, H., Valverde, F., and Coupland, G.  
833 (2001). CONSTANS mediates between the circadian clock and the control of  
834 flowering in Arabidopsis. *Nature* 410:1116–1120.
- 835 Takeno, K. (2016). Stress-induced flowering: the third category of flowering response. *J.*  
836 *Exp. Bot.* 67:4925–4934.
- 837 Turck, F., Fornara, F., and Coupland, G. (2008). Regulation and identity of Florigen:  
838 FLOWERING LOCUS T moves center stage. *Annu. Rev. Plant Biol.* 59:573–594.
- 839 Valverde, F., Mouradov, A., Soppe, W., Ravenscroft, D., Samach, A., and Coupland, G.  
840 (2004). Photoreceptor regulation of CONSTANS protein in photoperiodic flowering.  
841 *Science* 303:1003–1006.
- 842 Wang, P., Zhao, Y., Li, Z., Hsu, C.-C., Liu, X., Fu, L., Hou, Y.-J., Du, Y., Xie, S., Zhang, C.,  
843 et al. (2018). Reciprocal regulation of the TOR kinase and ABA receptor balances  
844 plant growth and stress response. *Mol. Cell* 69:100-112.e6.
- 845 Zhang, Y.-L., Li, E., Feng, Q.-N., Zhao, X.-Y., Ge, F.-R., Zhang, Y., and Li, S. (2015). Protein  
846 palmitoylation is critical for the polar growth of root hairs in Arabidopsis. *BMC Plant*  
847 *Biol.* 15:50.
- 848 Zhou, L.-Z., Li, S., Feng, Q.-N., Zhang, Y.-L., Zhao, X., Zeng, Y., Wang, H., Jiang, L., and  
849 Zhang, Y. (2013). Protein S-acyl transferase10 is critical for development and salt  
850 tolerance in Arabidopsis. *Plant Cell* 25:1093–1107.
- 851 Zoltowski, B. D., and Imaizumi, T. (2014). Structure and function of the ZTL/FKF1/LKP2  
852 group proteins in Arabidopsis. *The Enzymes* 35:213–239.
- 853
- 854

855 **Figure Legends**

856 **Figure 1. SOS3 controls flowering under salt stress through the CO/FT pathway.**

857 (A) Effect of salt on the flowering time in wild-type *Col-g1* (WT), and mutants *sos1-1*, *sos2-2*  
858 and *sos3-1* overexpressing or not *GIGANTEA* (*GI-OX*). Eight-day old seedlings were  
859 transferred to MS media supplemented or not with 30 mM NaCl. The photographs were  
860 taken after bolting. Representative plants are shown. (B) Rosette leaf number at bolting time  
861 of plants grown with and without salt, as in (A) to score flowering time. Data is shown as box  
862 plots: center lines show the medians; box limits indicate the 25th and 75th percentiles;  
863 whiskers extend to the minimum and maximum (n=16). Asterisks indicate significantly  
864 different means of samples with and without salt for each genotype, and letters indicate  
865 differences of mutant and transformed lines with the corresponding sample of the WT with  
866 and without salt at p<0.01, Fisher's LSD test; means with the same letter are statistically  
867 similar. (C) Transcript levels of *CO*, *FT* and *GI* in wild-type (*Col-g1*) and *sos3-1* mutant.  
868 Two-week old plants grown in long-days were left untreated (open symbols) or treated with  
869 100 mM NaCl (filled symbols) at the beginning of the light period (ZT0), and harvested every  
870 4 h. Total RNA was isolated and transcript levels of *CO*, *FT* and *GI* were measured by qRT-  
871 PCR and normalized to that of *At5g12240*. Errors bars represent means  $\pm$  SEM from at  
872 three replicates with three technical replicates each. Asterisks indicate significant differences  
873 between genotypes with the same treatment, \* p<0.05, \*\* p<0.01, by Fisher's LSD test. The  
874 white and black bars on top indicate light and dark periods.

875

876 **Figure 2. Stability of the nuclear fraction of GI controls time of flowering.**

877 (A) Eight-day old plants of wild-type *Col-0* (WT) and the *gi-2* mutant transformed with *GI*-  
878 *GFP*, *GI-NLS* and *GI-NES* were grown in LDs treated or not with 50 mM NaCl. (B) Flowering  
879 time was counted as the rosette leaf number at bolting. Shown are the Box plots: center  
880 lines show the medians; box limits indicate the 25th and 75th percentiles; whiskers extend to  
881 the minimum and maximum (n $\geq$ 15). Letters indicate significantly different means at p<0.01,

882 by Fisher's LSD test. (C) Cytosolic and nuclear proteins were extracted from 2-week old *GI-*  
883 *OX*, *sos2-2 GI-OX* and *sos3-1 GI-OX* plants treated with (indicated as 12+) or without  
884 (indicated as 12-) 100 mM NaCl for 12 h. Immunoblots with HA antibody were performed to  
885 detect GI protein.  $\alpha$ -PEPC and  $\alpha$ -H3 antibodies were used for cytosolic and nuclear markers,  
886 respectively. This experiment was repeated three times with similar results.

887

### 888 **Figure 3. Salt- and Ca<sup>2+</sup>-dependent interaction of SOS3 with GI.**

889 **(A)** Co-immunoprecipitation of SOS3 and GI. Tobacco leaves transiently expressing SOS3-  
890 MYC and GI-HA were treated with 100 mM NaCl for 8 h and total proteins were pulled down  
891 with HA antibodies ( $\alpha$ -HA). The SOS3 protein was detected by MYC antibodies ( $\alpha$ -MYC). **(B)**  
892 Ca<sup>2+</sup> effect on the interaction between SOS3 and GI. Tobacco leaves transiently expressing  
893 SOS3-MYC and GI-HA were treated with 3 mM CaCl<sub>2</sub>, or with 3 mM CaCl<sub>2</sub> and 2 mM EGTA.  
894 **(C)** The SOS3-1 protein with a mutated EF-hand motif cannot bind to GI. **(D)** BiFC of GI and  
895 SOS3. Tagged GI-VN and SOS3-VC were transiently expressed in tobacco leaves and  
896 plants were treated for 6 to 8 h with 100 mM NaCl or 3 mM CaCl<sub>2</sub> with or without 2 mM  
897 EGTA. Fluorescent signals were detected under confocal laser scanning microscope. Bar  
898 represents 100  $\mu$ m. **(E)** The number of fluorescent nuclei in five images (0.4 mm<sup>2</sup>) of three  
899 biological replicas was counted and the results are shown as box plots: center lines show  
900 the medians; box limits indicate the 25th and 75th percentiles; whiskers extend to the  
901 minimum and maximum (n $\geq$ 10). Letters indicate significantly different means,  $p < 0.001$  by  
902 Fisher's LSD test, (n $\geq$ 10); means with the same letter are statistically similar.

903

### 904 **Figure 4. S-acylation of SOS3 at Cys-3.**

905 **(A)** Wild-type SOS3 and mutant variants G2A, C3A and the double mutant G2A/C3A, were  
906 expressed transiently in *N. benthamiana*. Leaf extracts were treated with 30 mM N-  
907 ethylmaleimide (NEM) under denaturing conditions to block free cysteine thiols and proteins  
908 were acetone precipitated. Resuspended proteins were incubated with thiopropyl-sepharose

909 6B in the presence (+) or absence (-) of 0.5 M hydroxylamine (HyA) to break palmitoyl  
910 thioester bonds. Right, covalently bound proteins were eluted with 50 mM DTT and probed  
911 by western blot using  $\alpha$ -SOS3 antibody. Left, control of total leaf proteins applied as input for  
912 acyl-RAC, probed with  $\alpha$ -SOS3 antibodies. Each lane contains proteins corresponding to 0.5  
913 mg leaf tissue. **(B)** Wild-type SOS3 and mutant proteins G2A, C3A and G2A/C3A were  
914 expressed in yeast. Protein extracts were treated with NEM to block free cysteine thiols, and  
915 thereafter incubated in the presence (+) or absence (-) of hydroxylamine (HyA), precipitated  
916 with TCA and resuspended in 10 mM methyl-PEG24-maleimide, which alkylates newly  
917 formed cysteine thiols. Proteins resolved in SDS-PAGE were subjected to western blot  
918 analysis using the  $\alpha$ -SOS3 antibody. The theoretical mass of SOS3 with 6xHis tag is 26.5  
919 kDa and MM(PEG)<sub>24</sub> adds 1.24 kDa for each cysteine alkylated (arrowheads).

920

921 **Figure 5. Nuclear localization of SOS3 is required for flowering under salt stress.**

922 **(A)** Effect of salt on the flowering time of wild-type (WT), mutant *sos3-1*, and the *sos3-1*  
923 mutant expressing the wild-type (SOS3-OX), or non-acylated proteins SOS3-G2A and  
924 SOS3-C3A. Eight-day old seedlings were transferred to MS media supplemented with 50  
925 mM NaCl. Photographs were taken after bolting. **(B)** Rosette leaf number was counted at  
926 bolting as flowering time. Shown are the Box plots: center lines show the medians; box limits  
927 indicate the 25th and 75th percentiles; whiskers extend to the minimum and maximum  
928 (n=15). Letters indicate significantly different means at p<0.01, by Fisher's LSD test. **(C)** Co-  
929 immunoprecipitation of GI and SOS3 proteins. Tagged proteins SOS3-GFP, SOS3-G2A-  
930 GFP and SOS3-C3A-GFP were transiently co-expressed with GI-HA in tobacco leaves.  
931 Total proteins were extracted and immunoprecipitation was done with GFP antibodies ( $\alpha$ -  
932 GFP). Arrows indicate the target proteins. **(D)** BiFC of mutant SOS3 proteins with GI (left), or  
933 SOS2 (right). Indicated proteins were transiently expressed in tobacco leaves. YFP signals  
934 were detected under confocal microscope. Scale Bar represents 20  $\mu$ m.

935

936 **Figure 6. Palmitoylation directs SOS3 nuclear import.**

937 **(A, B)** Mutation of the S-acylation site in SOS3 abrogates import into the nucleus. **(A)**  
938 Transient expression in *Nicotiana* of GFP-fused to the C-terminal part of SOS3, SOS3-G2A,  
939 and SOS3-C3A was detected under a confocal microscope. Scale bar represents 20  $\mu\text{m}$ . **(B)**  
940 Normalized nuclear fluorescence intensity vs. total cell fluorescence. Shown in the Box plot:  
941 center lines show the medians; box limits indicate the 25th and 75th percentiles; whiskers  
942 extend to the minimum and maximum ( $n \geq 3$ ). Asterisks indicate significantly different means  
943 of samples with and without salt for each genotype at  $p < 0.01$  by Fisher's LSD test. **(C, D)** 2-  
944 BrP inhibits SOS3 import to the nucleus. **(C)** Representative images of root meristematic  
945 epidermal cells of *Arabidopsis sos3-1* seedlings expressing *proSOS3:SOS3-GFP*. After 5  
946 days growing under control conditions, plants were exposed for one additional day to mock  
947 or 50  $\mu\text{M}$  of 2-BrP. Plants were treated with 0.1 % Triton X-100 before imaging to allow  
948 counter-staining of nuclei with DAPI. Scale bar 5  $\mu\text{m}$ . **(D)** SOS3-GFP fluorescence signal  
949 (mean gray intensity) in cytoplasm and nucleus of cells as shown in (C). Data are  
950 represented as in (B) from 13 different plants, 10 cells each. Asterisks indicates means  
951 statistically different at  $p < 0,001$  Fisher's LSD test. **(E)** Representative fluorescence images  
952 of root meristematic epidermal cells of *sos3-1* seedlings expressing *proSOS3:SOS3-GFP*  
953 under spinning disc confocal microscopy. Five days old seedlings were exposed for one  
954 additional day to the indicated treatments (mock, 100 mM NaCl, 50  $\mu\text{M}$  2-BrP, and 100 mM  
955 NaCl plus 50  $\mu\text{M}$  2-BrP). Arrows indicate the nuclei. Scale bar is 10  $\mu\text{m}$ . **(F)** Percentage of  
956 fluorescence intensity (mean gray intensity) after treatments normalized to the signal in the  
957 same cellular compartment under control conditions (mock) of samples shown in (E); Shown  
958 are the Box plots based on Tukey methods. Data are from 9 different plants, 10 cells each;  
959 Letters indicate significantly different means, based on One-way analysis of variance  
960 followed by Tukey's multiple comparisons test, Dunnett's T3 test when variance was unequal  
961 (nucleus),  $p < 0.05$ . Triangles represent outlier data points, not excluded for statistical  
962 analyses. **(G)** Nucleo-cytoplasmic fractionation. Nuclear and cytoplasmic proteins of *sos3-1*

963 plants overexpressing wild-type SOS3, or mutants G2A (right panel) and C3A (left), were  
964 fractionated and probed with antibodies against SOS3, the cytoplasmic marker protein  
965 PEPC, and the nuclear marker Histone3 (H3). Loading of nuclear proteins was 10-fold  
966 higher than of cytosolic proteins to compensate for the lower abundance of SOS3 in the  
967 nucleus.

968

969 **Figure 7. SOS3 forms a complex with GI and FKF at the CO promoter.**

970 (A) SOS3-FLAG was transiently co-expressed with GI-HA and/or FKF1-MYC in tobacco  
971 leaves. Total proteins from leaves treated with 100 mM NaCl for 8 h were extracted and  
972 immunoprecipitated with FLAG antibodies ( $\alpha$ -FLAG). \*, non-specific band.

973 (B,C) Schematic drawing of the CO gene promoter, and locations of amplicons (A, B, and C)  
974 for ChIP analysis. (C) Salt-induced association of SOS3 onto CO promoter. Chromatin  
975 isolated from two-week old *GI-GFPox* (GI) and *SOS3-GFPox* (SOS3) plants treated (NaCl)  
976 with 100 mM NaCl for 10 h or not (Control), was immunoprecipitated with  $\alpha$ -GFP antibodies.  
977 Immunoprecipitated and input DNA were used as templates for qPCR using primers  
978 specifically targeting to the amplicons A, B, and C. *UBQ10* was used as control. Data is  
979 fragment enrichment as percent of input DNA. Error bars represent SE ( $n \geq 2$ ). The  
980 experiment was repeated two times with similar results.

981 (D) Simplified working model: Upon salt stress, SOS3 senses and binds elevated cytosolic  
982  $Ca^{2+}$ . Calcium-bound SOS3 activates and recruits SOS2 to the plasma membrane through  
983 the myristoylation of SOS3, to phosphorylate and activate SOS1, a  $Na^+$  transporter  
984 mediating  $Na^+$  exclusion and salt tolerance. Free cytosolic GI is degraded to delay flowering.  
985 S-acylated SOS3 enters the nucleus to make a transcriptional complex with GI and FKF1  
986 that supports CO expression to ensure later flowering under salt stress.

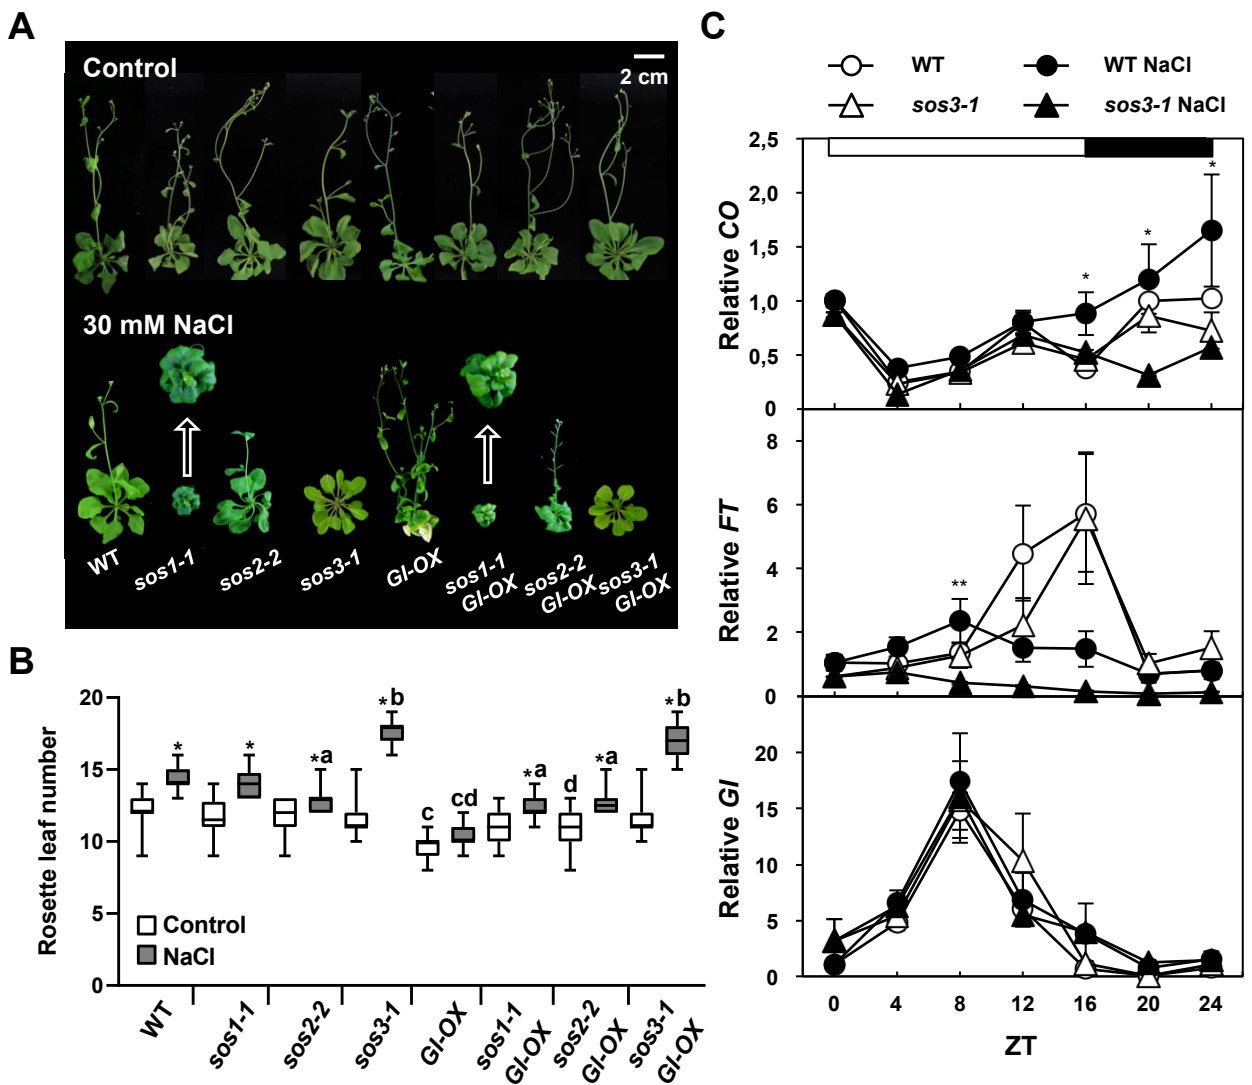

**Figure 1. SOS3 controls flowering under salt stress through the CO/FT pathway.**

(A) Effect of salt on the flowering time in wild-type *Col-g1/1* (WT), and mutants *sos1-1*, *sos2-2* and *sos3-1* overexpressing or not *GIGANTEA* (*GI-OX*). Eight-day old seedlings were transferred to MS media supplemented or not with 30 mM NaCl. The photographs were taken after bolting. Representative plants are shown. (B) Rosette leaf number at bolting time of plants grown with and without salt, as in (A) to score flowering time. Data is shown as box plots: center lines show the medians; box limits indicate the 25th and 75th percentiles; whiskers extend to the minimum and maximum (n=16). Asterisks indicate significantly different means of samples with and without salt for each genotype, and letters indicate differences of mutant and transformed lines with the corresponding sample of the WT with and without salt at p<0.01, Fisher's LSD test; means with the same letter are statistically similar. (C) Transcript levels of *CO*, *FT* and *GI* in wild-type (*Col-g1/1*) and *sos3-1* mutant. Two-week old plants grown in long-days were left untreated (open symbols) or treated with 100 mM NaCl (filled symbols) at the beginning of the light period (ZT0), and harvested every 4 h. Total RNA was isolated and transcript levels of *CO*, *FT* and *GI* were measured by qRT-PCR and normalized to that of *At5g12240*. Errors bars represent means  $\pm$  SEM from at three replicates with three technical replicates each. Asterisks indicate significant differences between genotypes with the same treatment, \* p<0.05, \*\* p<0.01, by Fisher's LSD test. The white and black bars on top indicate light and dark periods.

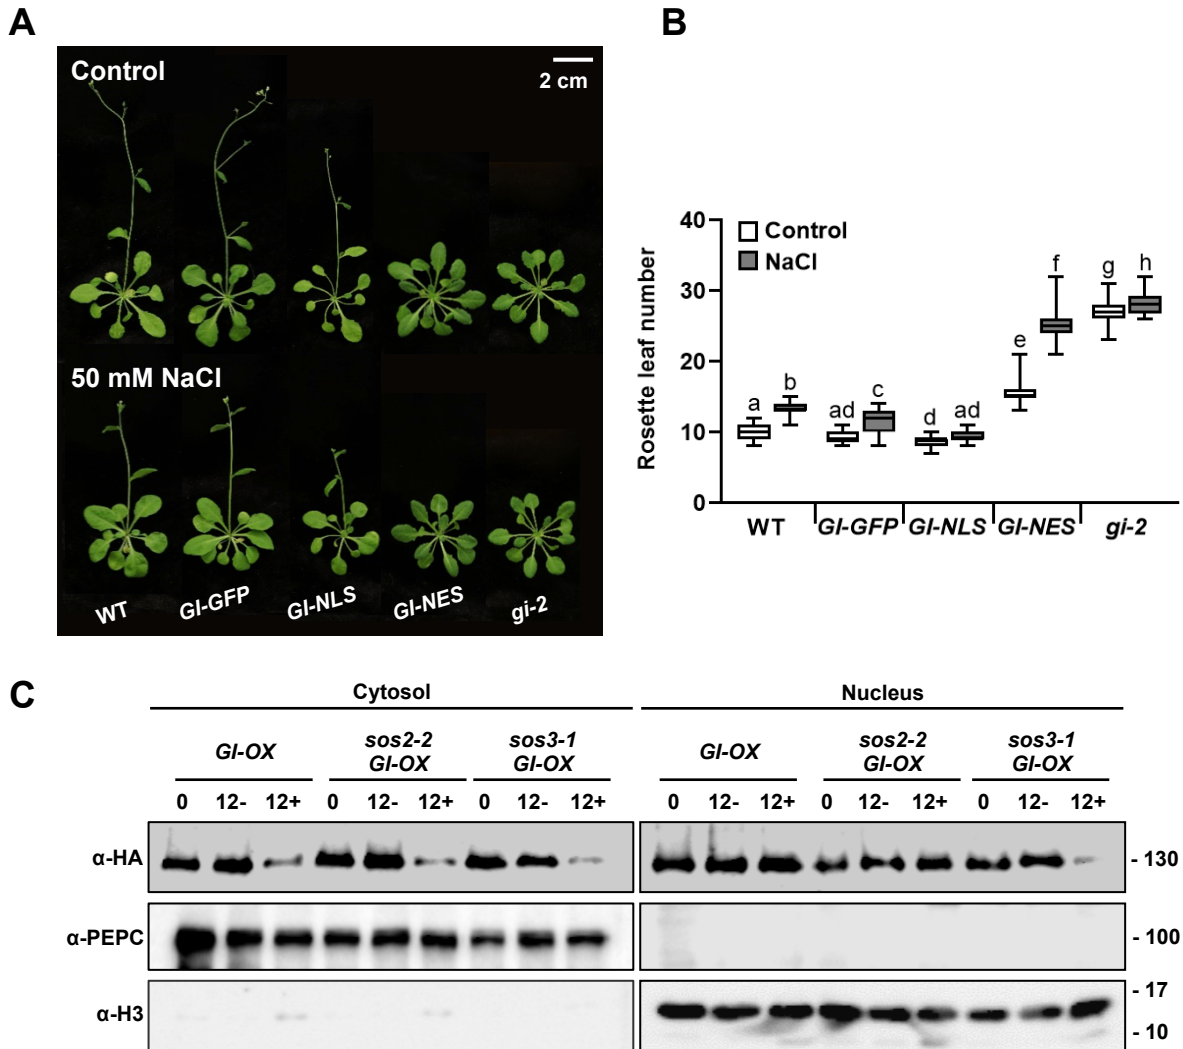

**Figure 2. Stability of the nuclear fraction of GI controls time of flowering.**

(A) Eight-day old plants of wild-type Col-0 (WT) and the *gi-2* mutant transformed with *GI-GFP*, *GI-NLS* and *GI-NES* were grown in LDs treated or not with 50 mM NaCl. (B) Flowering time was counted as the rosette leaf number at bolting. Shown are the Box plots: center lines show the medians; box limits indicate the 25th and 75th percentiles; whiskers extend to the minimum and maximum ( $n \geq 15$ ). Letters indicate significantly different means at  $p < 0.01$ , by Fisher's LSD test. (C) Cytosolic and nuclear proteins were extracted from 2-week old *GI-OX*, *sos2-2 GI-OX* and *sos3-1 GI-OX* plants treated with (indicated as 12+) or without (indicated as 12-) 100 mM NaCl for 12 h. Immunoblots with HA antibody were performed to detect GI protein.  $\alpha$ -PEPC and  $\alpha$ -H3 antibodies were used for cytosolic and nuclear markers, respectively. This experiment was repeated three times with similar results.



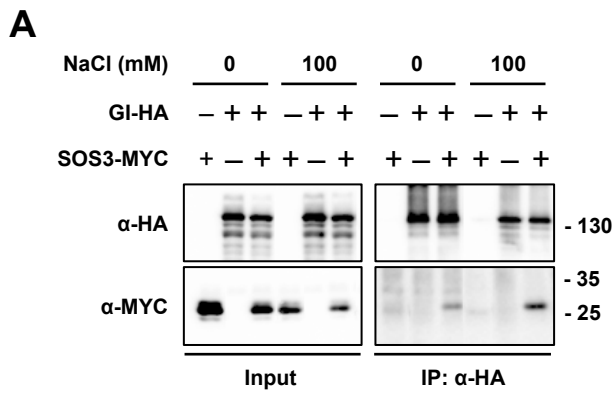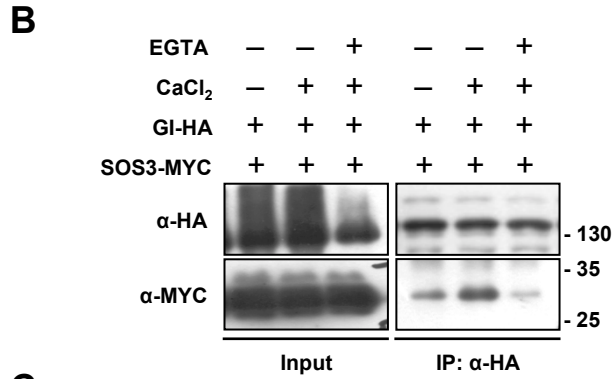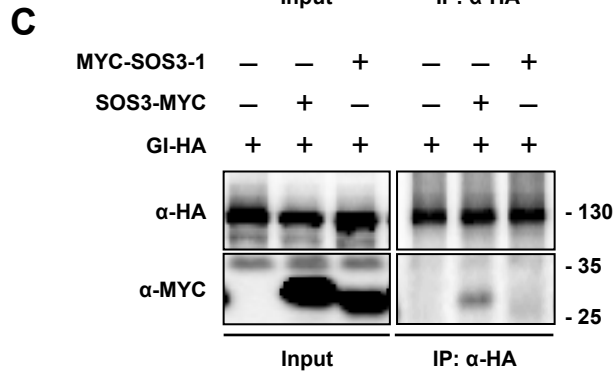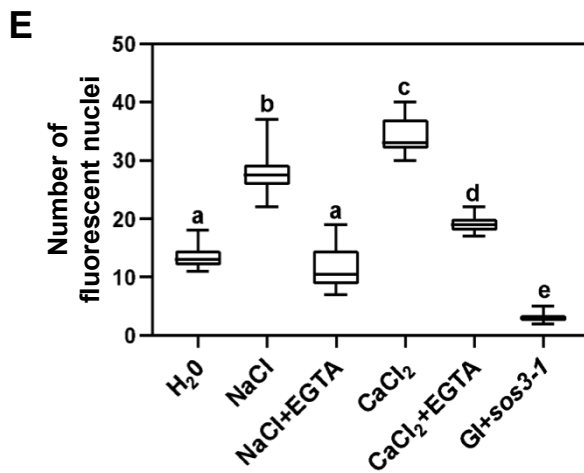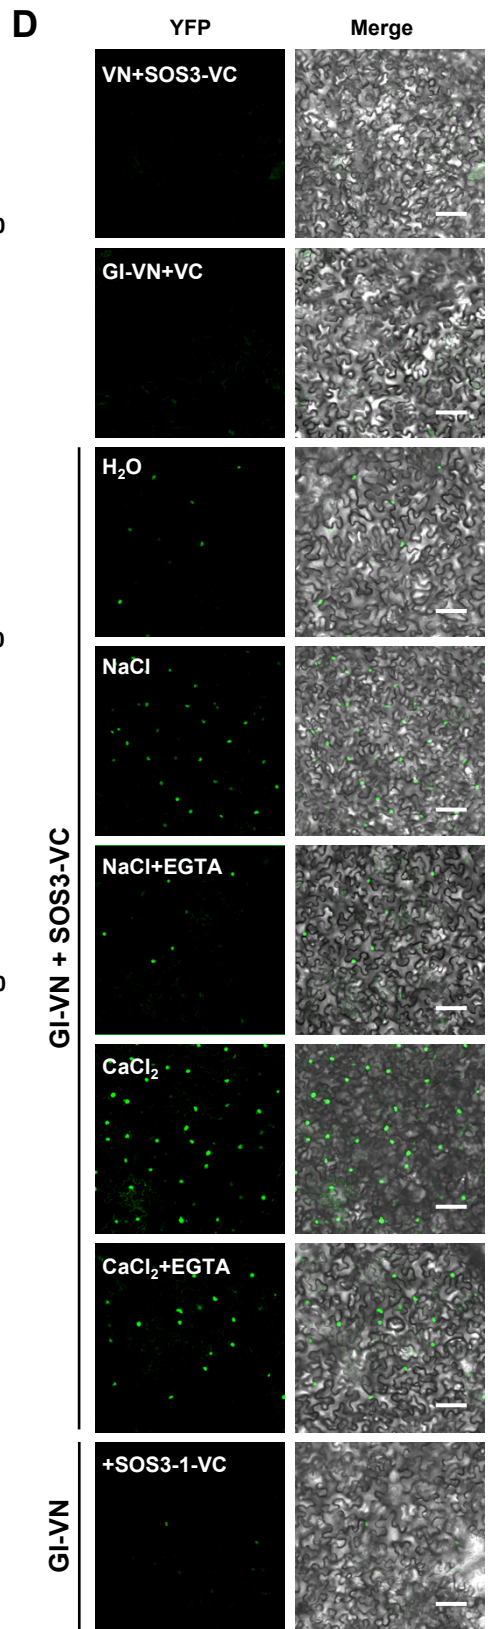

**Figure 3. Salt- and Ca<sup>2+</sup>-dependent interaction of SOS3 with GI.**

(A) Co-immunoprecipitation of SOS3 and GI. Tobacco leaves transiently expressing SOS3-MYC and GI-HA were treated with 100 mM NaCl for 8 h and total proteins were pulled down with HA antibodies ( $\alpha$ -HA). The SOS3 protein was detected by MYC antibodies ( $\alpha$ -MYC). (B) Ca<sup>2+</sup> effect on the interaction between SOS3 and GI. Tobacco leaves transiently expressing SOS3-MYC and GI-HA were treated with 3 mM CaCl<sub>2</sub>, or with 3 mM CaCl<sub>2</sub> and 2 mM EGTA. (C) The SOS3-1 protein with a mutated EF-hand motif cannot bind to GI. (D) BiFC of GI and SOS3. Tagged GI-VN and SOS3-VC were transiently expressed in tobacco leaves and plants were treated for 6 to 8 h with 100 mM NaCl, or 3 mM CaCl<sub>2</sub>, with or without 2 mM EGTA. Fluorescent signals were detected under confocal laser scanning microscope. Bar represents 100  $\mu$ m. (E) The number of fluorescent nuclei in five images (0.4 mm<sup>2</sup>) of three biological replicas was counted and the results are shown as box plots: center lines show the medians; box limits indicate the 25th and 75th percentiles; whiskers extend to the minimum and maximum ( $n \geq 10$ ). Letters indicate significantly different means,  $p < 0.001$  by Fisher's LSD test, ( $n \geq 10$ ); means with the same letter are statistically similar.

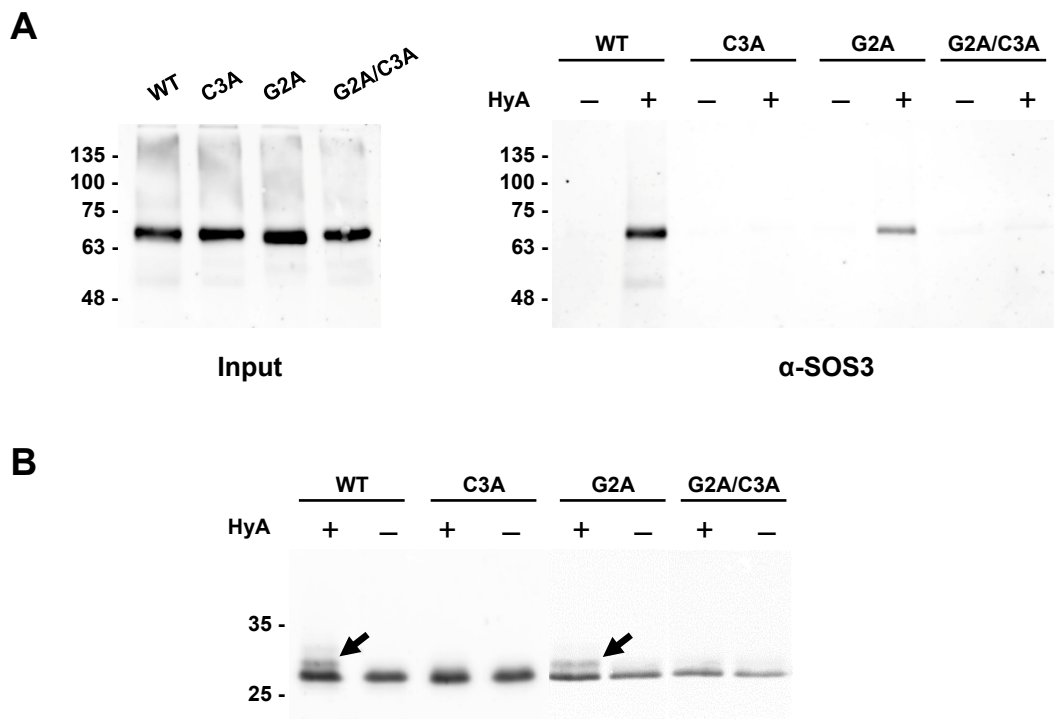

**Figure 4. S-acylation of SOS3 at Cys-3.**

(A) Wild-type SOS3 and mutant variants G2A, C3A and the double mutant G2A/C3A, were expressed transiently in *N. benthamiana*. Leaf extracts were treated with 30 mM N-ethylmaleimide (NEM) under denaturing conditions to block free cysteine thiols and proteins were acetone precipitated. Resuspended proteins were incubated with thiopropyl-sepharose 6B in the presence (+) or absence (-) of 0.5 M hydroxylamine (HyA) to break palmitoyl thioester bonds. Right, covalently bound proteins were eluted with 50 mM DTT and probed by western blot using  $\alpha$ -SOS3 antibody. Left, control of total leaf proteins applied as input for acyl-RAC, probed with  $\alpha$ -SOS3 antibodies. Each lane contains proteins corresponding to 0.5 mg leaf tissue. (B) Wild-type SOS3 and mutant proteins G2A, C3A and G2A/C3A were expressed in yeast. Protein extracts were treated with NEM to block free cysteine thiols, and thereafter incubated in the presence (+) or absence (-) of hydroxylamine (HyA), precipitated with TCA and resuspended in 10 mM methyl-PEG<sub>24</sub>-maleimide, which alkylates newly formed cysteine thiols. Proteins resolved in SDS-PAGE were subjected to western blot analysis using the  $\alpha$ -SOS3 antibody. The theoretical mass of SOS3 with 6xHis tag is 26.5 kDa and MM(PEG)<sub>24</sub> adds 1.24 kDa for each cysteine alkylated (arrowheads).

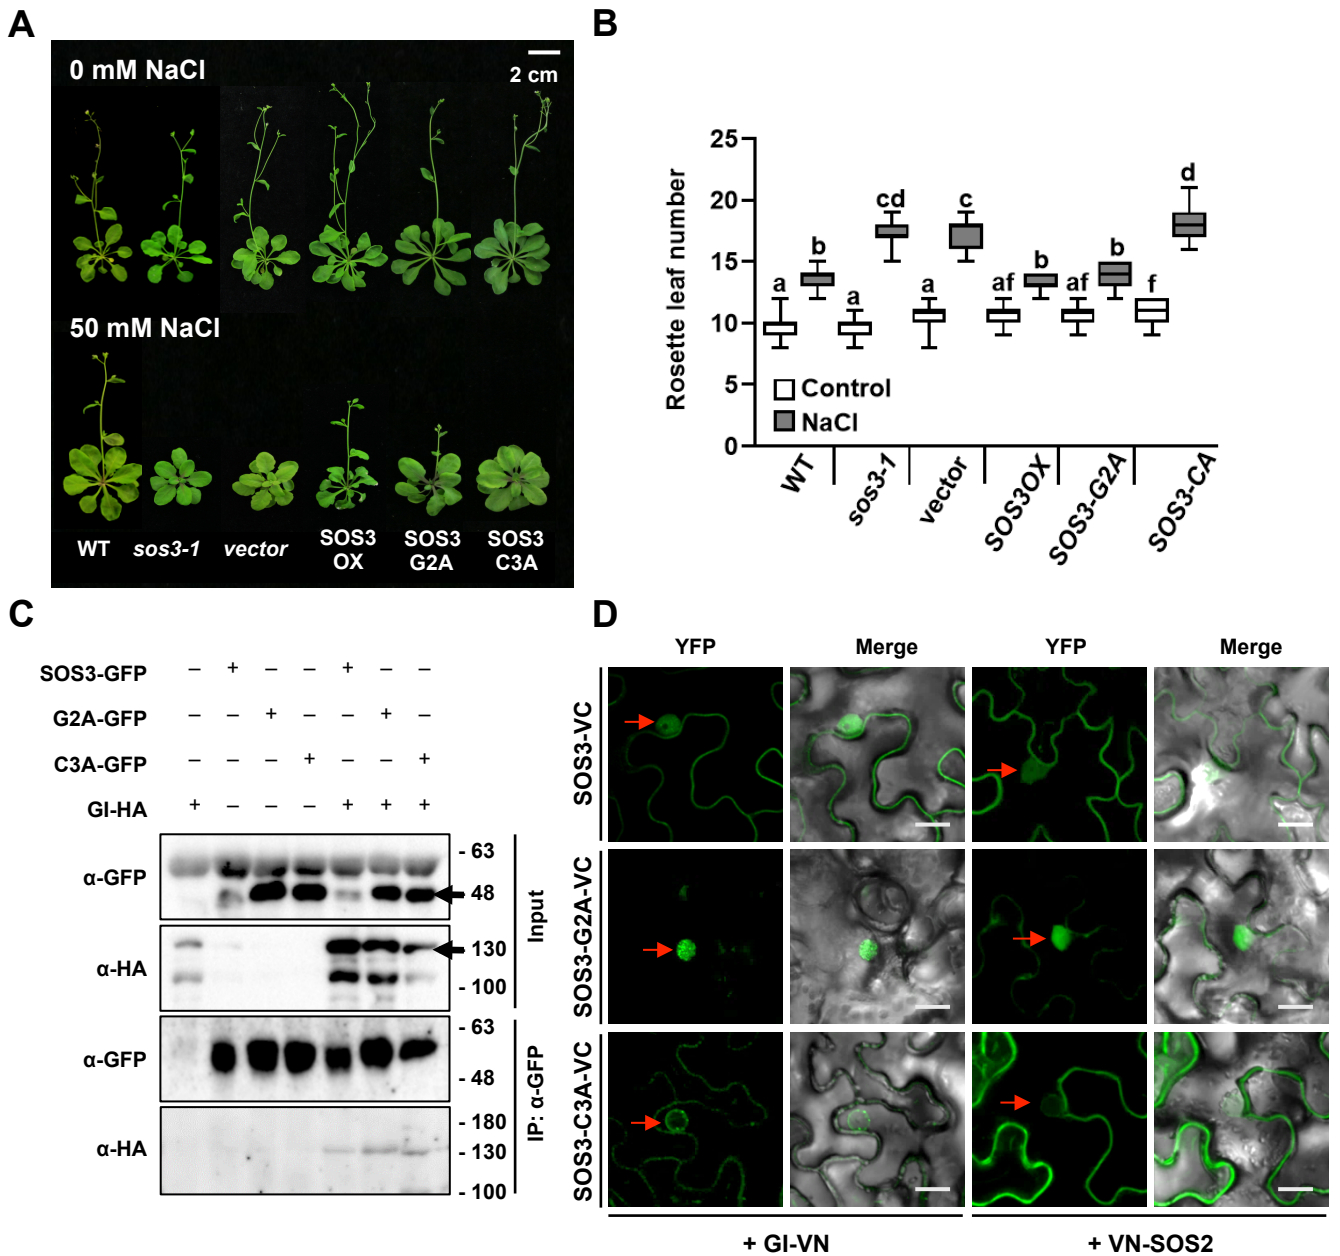

**Figure 5. Nuclear localization of SOS3 is required for flowering under salt stress.**

(A) Effect of salt on the flowering time of wild-type (WT), mutant *sos3-1*, and the *sos3-1* mutant expressing the wild-type (SOS3-OX), or non-acylated proteins SOS3-G2A and SOS3-C3A. Eight-day old seedlings were transferred to MS media supplemented with 50 mM NaCl. Photographs were taken after bolting. (B) Rosette leaf number was counted at bolting as flowering time. Shown are the Box plots: center lines show the medians; box limits indicate the 25th and 75th percentiles; whiskers extend to the minimum and maximum (n=15). Letters indicate significantly different means at  $p < 0.01$ , by Fisher's LSD test. (C) Co-immunoprecipitation of GI and SOS3 proteins. Tagged proteins SOS3-GFP, SOS3-G2A-GFP and SOS3-C3A-GFP were transiently co-expressed with GI-HA in tobacco leaves. Total proteins were extracted and immunoprecipitation was done with GFP antibodies ( $\alpha$ -GFP). Arrows indicate the target proteins. (D) BiFC of mutant SOS3 proteins with GI (left), or SOS2 (right). Indicated proteins were transiently expressed in tobacco leaves. YFP signals were detected under confocal microscope. Scale Bar represents 20  $\mu$ m.

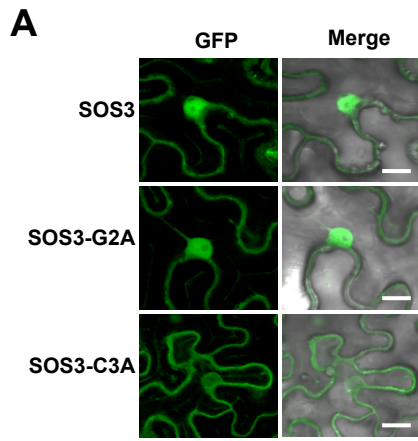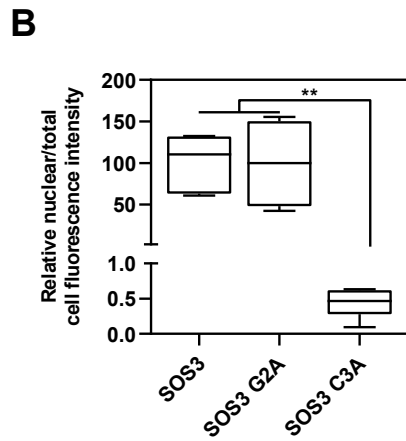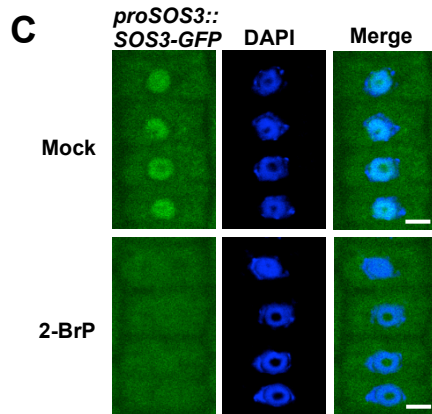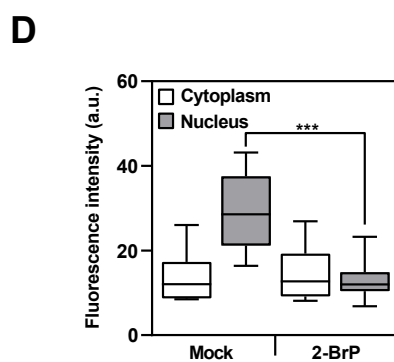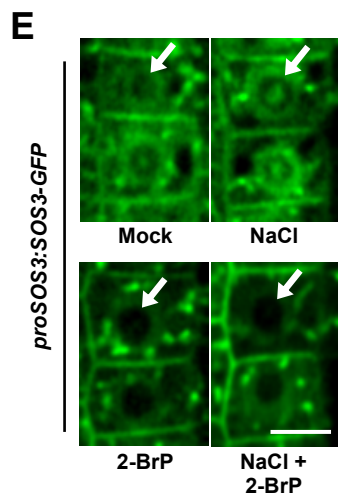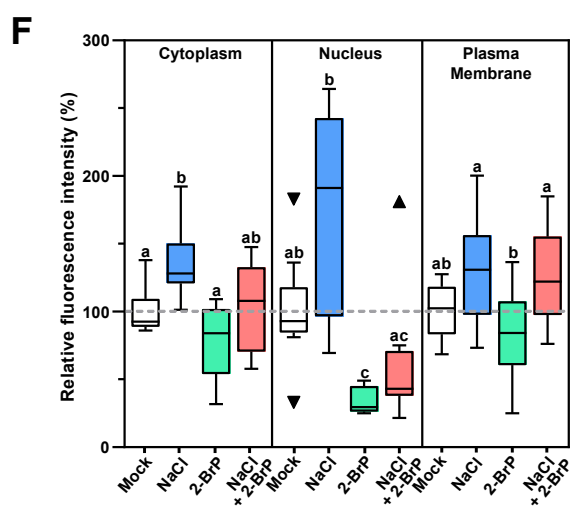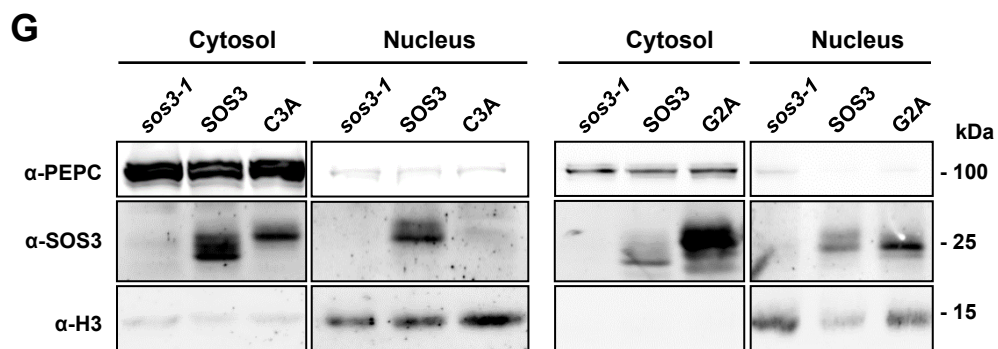

### Figure 6. Palmitoylation directs SOS3 nuclear import.

(A, B) Mutation of the S-acylation site in SOS3 abrogates import into the nucleus. (A) Transient expression in *Nicotiana* of GFP-fused to the C-terminal part of SOS3, SOS3-G2A, and SOS3-C3A was detected under a confocal microscope. Scale bar represents 20  $\mu\text{m}$ . (B) Normalized nuclear fluorescence intensity vs. total cell fluorescence. Shown in the Box plot: center lines show the medians; box limits indicate the 25th and 75th percentiles; whiskers extend to the minimum and maximum ( $n \geq 3$ ). Asterisks indicate significantly different means of samples with and without salt for each genotype at  $p < 0.01$  by Fisher's LSD test. (C, D) 2-BrP inhibits SOS3 import to the nucleus. (C) Representative images of root meristematic epidermal cells of *Arabidopsis sos3-1* seedlings expressing *proSOS3:SOS3-GFP*. After 5 days growing under control conditions, plants were exposed for one additional day to mock or 50  $\mu\text{M}$  of 2-BrP. Plants were treated with 0.1 % Triton X-100 before imaging to allow counter-staining of nuclei with DAPI. Scale bar 5  $\mu\text{m}$ . (D) SOS3-GFP fluorescence intensity (mean gray value (a.u.)) in cytoplasm and nucleus of cells as shown in (C). Data are represented as in (B) from 13 different plants, 10 cells each. Asterisks indicates means statistically different at  $p < 0,001$  Fisher's LSD test. (E) Representative fluorescence images of root meristematic epidermal cells of *sos3-1* seedlings expressing *proSOS3:SOS3-GFP* under spinning disc confocal microscopy. Five days old seedlings were exposed for one additional day to the indicated treatments (mock, 100 mM NaCl, 50  $\mu\text{M}$  2-BrP, and 100 mM NaCl plus 50  $\mu\text{M}$  2-BrP). Arrows indicate the nuclei. Scale bar is 10  $\mu\text{m}$ . (F) Percentage of fluorescence intensity (mean gray value (a.u.) after treatments normalized to the signal in the same cellular compartment under control conditions (mock) of samples shown in (E); Shown are the Box plots based on Tukey methods. Data are from 9 different plants, 10 cells each; Letters indicate significantly different means, based on One-way analysis of variance followed by Tukey's multiple comparisons test, Dunnett's T3 test when variance was unequal (nucleus),  $p < 0.05$ . Triangles represent outlier data points, not excluded for statistical analyses. (G) Nucleo-cytoplasmic fractionation. Nuclear and cytoplasmic proteins of *sos3-1* plants overexpressing wild-type SOS3, or mutants G2A (right panel) and C3A (left), were fractionated and probed with antibodies against SOS3, the cytoplasmic marker protein PEPC, and the nuclear marker Histone3 (H3). Loading of nuclear proteins was 10-fold higher than of cytosolic proteins to compensate for the lower abundance of SOS3 in the nucleus.

**A**

|           | 0 mM |   |   |   | 100 mM |   |   |   |
|-----------|------|---|---|---|--------|---|---|---|
|           | -    | + | - | + | -      | + | - | + |
| GI-HA     | -    | + | - | + | -      | + | - | + |
| FKF1-MYC  | -    | - | + | + | -      | - | + | + |
| SOS3-FLAG | +    | + | + | + | +      | + | + | + |

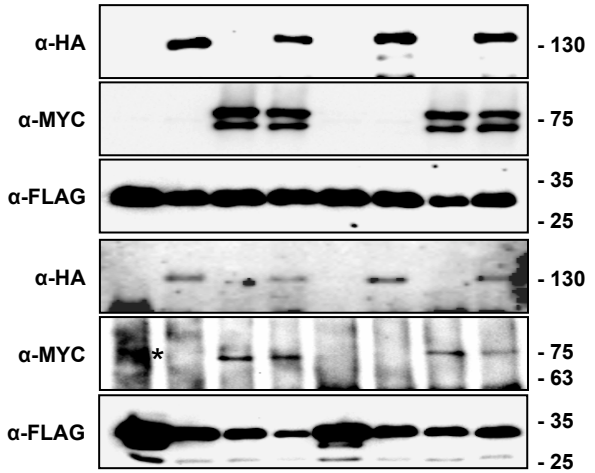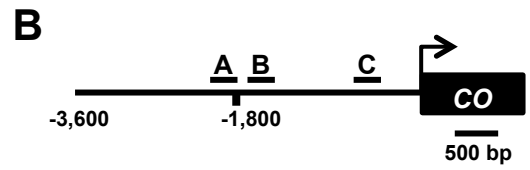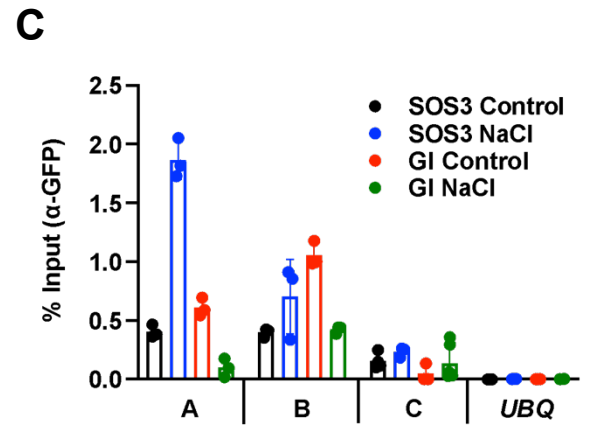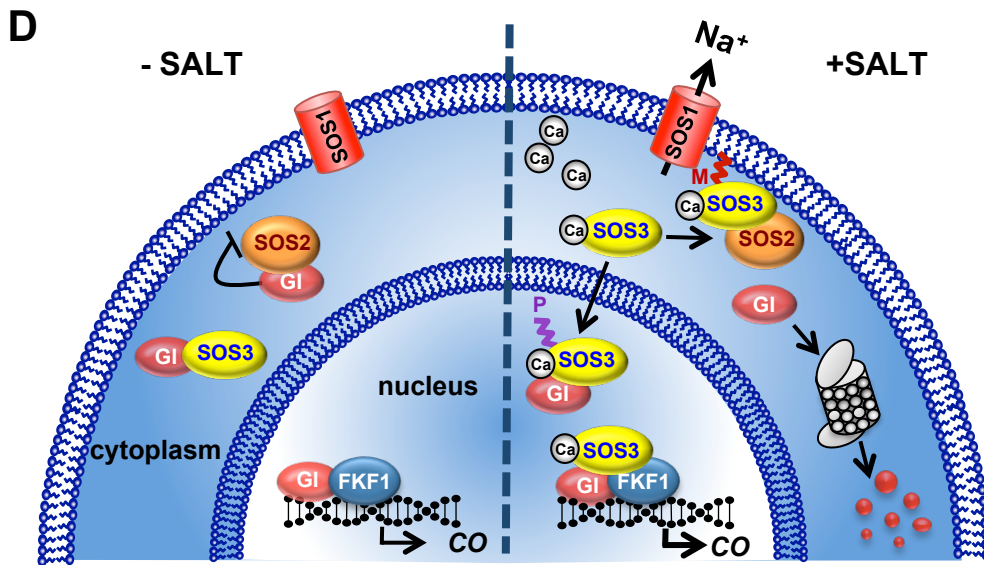

**Figure 7. SOS3 forms a complex with GI and FKF at the CO promoter.**

(A) SOS3-FLAG was transiently co-expressed with GI-HA and/or FKF1-MYC in tobacco leaves. Total proteins from leaves treated with 100 mM NaCl for 8 h were extracted and immunoprecipitated with FLAG antibodies ( $\alpha$ -FLAG). \*, non-specific band.

(B,C) Schematic drawing of the CO gene promoter and locations of amplicons (A, B, and C) for ChIP analysis. (C) Salt-induced association of SOS3 onto CO promoter. Chromatin isolated from two-week old *GI-GFPox* and *SOS3-GFPox* plants treated (NaCl) with 100 mM NaCl for 10 h or not (Control), was immunoprecipitated with  $\alpha$ -GFP antibodies. Immunoprecipitated and input DNA were used as templates for qPCR using primers specifically targeting to the amplicons A, B, and C. *UBQ10* was used as control. Data is fragment enrichment as percent of input DNA. Error bars represent SE ( $n \geq 2$ ). The experiment was repeated two times with similar results.

(D) Simplified working model: Upon salt stress, SOS3 senses and binds elevated cytosolic  $Ca^{2+}$ . Calcium-bound SOS3 activates and recruits SOS2 to the plasma membrane through the myristoylation of SOS3, to phosphorylate and activate SOS1, a  $Na^+$  transporter mediating  $Na^+$  exclusion and salt tolerance. Free cytosolic GI is degraded to delay flowering. S-acylated SOS3 enters the nucleus to make a transcriptional complex with GI and FKF1 that supports CO expression to ensure later flowering under salt stress.
